# Supplementary material for: Efficacy of PD-1/PD-L1 blockade monotherapy in clinical trials
Source: PubMed Central journal article supplement — Ther Adv Med Oncol. 2020 Jul 16;12:1758835920937612. doi: 10.1177/1758835920937612 (PMC7366397; doi:10.1177/1758835920937612), 2020-07-16
Supplement: supplement.pdf [file supplement.pdf]

**Supplemental table 1. Baseline characteristics of the eligible trials included in this study.**

| Study                          | Trial Phase | Line of treatment | Cancer type | PD-L1 detection assay | PD-1/PD-L1 inhibitor | Dosage                   | Treatment duration, median(range), m | Median follow-up (range), m | Median PFS (95% CI), m | Median OS (95% CI), m |
|--------------------------------|-------------|-------------------|-------------|-----------------------|----------------------|--------------------------|--------------------------------------|-----------------------------|------------------------|-----------------------|
| Balar,2017 <sup>1</sup>        | 2           | 1                 | UC          | Ventana SP142         | Atezolizumab         | 1200 mg Q3W              | 3.8(0-25.5)                          | 17.2(0.2-23.5)              | 2.7(2.1-4.2)           | 15.9(10.4-N)          |
| Colevas,2018 <sup>2</sup>      | 1           | 2+                | HNC         | Ventana SP142         | Atezolizumab         | 15, 20mg/kg, 1200 mg Q3W | 3.4(0.0-30.5)                        | <60.0                       | 2.6(0.5-48.4)          | 6.0(0.5-51.6+)        |
| Emens,2019 <sup>3</sup>        | 1           | 1+                | BC          | Ventana SP142         | Atezolizumab         | 15, 20mg/kg, 1200 mg Q3W | 2.1(0-45.6)                          | 25.3(0.4-45.6)              | 1.4(1.3-1.6)           | 17.6(10.2-N)          |
| Eng,2019 <sup>4</sup>          | 3           | 3+                | CRC         | Ventana SP142         | Atezolizumab         | 1200 mg Q3W              | 1.4                                  | NR                          | 1.9(1.9-2.1)           | 7.1(6.1-10.1)         |
| Fehrenbacher,2016 <sup>5</sup> | 2           | 2+                | LC          | Ventana SP142         | Atezolizumab         | 1200 mg Q3W              | 3.7(0-19.0)                          | 14.8(0.2-19.6)              | 2.7(2.0-4.7)           | 12.6(9.7-16.4)        |
| Fehrenbacher,2018 <sup>6</sup> | 3           | 2+                | LC          | Ventana SP142         | Atezolizumab         | 1200 mg Q3W              | 3.4(0.0-26.0)                        | 26                          | 2.8(2.6-3.0)           | 13.8(11.8-15.7)       |
| Horn,2018 <sup>7</sup>         | 1           | 2+                | LC          | Ventana SP142         | Atezolizumab         | 1-20mg/kg, 1200 mg Q3W   | 3.5(0.0-62.0)                        | 49.9(0.5-62.0)              | NR                     | NR                    |
| Liu,2019 <sup>8</sup>          | 1           | 1+                | OC          | Ventana SP142         | Atezolizumab         | 15mg/kg, 1200 mg Q3W     | 2.8(0.0-33.4)                        | 20.4(0.6-38.2)              | 2.9(1.3-5.5)           | 11.3(5.5-27.7)        |
| Liu,2019 <sup>8</sup>          | 1           | 1+                | UrC         | Ventana SP142         | Atezolizumab         | 15mg/kg, 1200 mg Q3W     | 4.1(0.0-20.7)                        | 20.4(0.6-38.2)              | 1.4(1.3-4.0)           | 9.6(6.8-13.8)         |

|                              |   |    |         |               |              |                         |               |                 |                |                |
|------------------------------|---|----|---------|---------------|--------------|-------------------------|---------------|-----------------|----------------|----------------|
| McDermott,2016 <sup>9</sup>  | 1 | 1+ | RC      | Ventana SP142 | Atezolizumab | 0.3-20mg/kg,1200 mg Q3W | 8.0(1.0-35.0) | 23.9            | 5.6(3.9-8.2)   | 28.9(20.0-N)   |
| McDermott,2018 <sup>10</sup> | 2 | 1  | RC      | Ventana SP142 | Atezolizumab | 1200 mg Q3W             | 7.6(0.0-33.1) | 20.7            | 11.7(8.4-17.3) | NR             |
| Peters,2017 <sup>11</sup>    | 2 | 1+ | LC      | Ventana SP142 | Atezolizumab | 1200 mg Q3W             | 4.2(0.0-21.0) | >12.0           | 5.4(3.0-6.9)   | 23.5(18.1-N)   |
| Petrylak,2018 <sup>12</sup>  | 1 | 2+ | UC      | Ventana SP142 | Atezolizumab | 15mg/kg, 1200 mg Q3W    | 3.0(0.0-44.0) | 37.8(0.7+-44.4) | 2.7(1.4-4.3)   | 10.1(7.3-17.0) |
| Powles,2017 <sup>13</sup>    | 3 | 2+ | UC      | Ventana SP142 | Atezolizumab | 1200 mg Q3W             | 2.8(0.0-24.0) | 17.3(0.0-24.5)  | 2.1(2.1-2.2)   | 11.1(8.6-15.5) |
| Pujol,2019 <sup>14</sup>     | 2 | 2  | LC      | Ventana SP142 | Atezolizumab | 1200 mg Q3W             | NR            | 13.7            | 1.4(1.2-1.5)   | 9.5(3.2-14.4)  |
| Rosenberg,2016 <sup>15</sup> | 2 | 2+ | UC      | Ventana SP142 | Atezolizumab | 1200 mg Q3W             | 3.0           | 11.7            | 2.1(2.1-2.1)   | 7.9(6.6-9.3)   |
| Spigel,2018 <sup>16</sup>    | 2 | 1+ | LC      | Ventana SP142 | Atezolizumab | 1200 mg Q3W             | 3.4           | 33.7            | NR             | NR             |
| Sternberg,2019 <sup>17</sup> | 3 | 2+ | UC      | Ventana SP142 | Atezolizumab | 1200 mg Q3W             | 2.8(0.0-19.0) | 12.7(0.0-19.7)  | 2.2(2.1-2.4)   | 8.7(7.8-9.9)   |
| Apolo,2017 <sup>18</sup>     | 1 | 2+ | UC      | Dako 73-10    | Avelumab     | 10 mg/kg Q2W            | 3.5           | 16.5            | 2.9(1.5-4.4)   | 13.7(8.5-N)    |
| Bang,2018 <sup>19</sup>      | 3 | 3  | GC/GEJC | Dako 73-10    | Avelumab     | 10 mg/kg Q2W            | 2.0(0.5-16.5) | 10.6(0.1-17.8)  | 1.4(1.4-1.5)   | 4.6(3.6-5.7)   |
| Barlesi,2018 <sup>20</sup>   | 3 | 2+ | LC      | Dako 73-10    | Avelumab     | 10 mg/kg Q2W            | 3.4           | 18.9            | 2.8(2.7-3.5)   | 11.4(9.4-13.9) |
| Chung,2019 <sup>21</sup>     | 1 | 1+ | GC/GEJC | Dako 73-10    | Avelumab     | 10 mg/kg Q2W            | 2.8           | 35.1            | 2.8(2.3-4.1)   | 11.1(8.9-13.7) |

|                             |   |    |         |            |            |                     |                |                  |              |                |
|-----------------------------|---|----|---------|------------|------------|---------------------|----------------|------------------|--------------|----------------|
| D'Angelo,2018 <sup>22</sup> | 2 | 1  | MCC     | Dako 73-10 | Avelumab   | 10 mg/kg Q2W        | 3.0(0.5-12.5)  | 5.1(0.3-11.3)    | NR           | NR             |
| Dirix,2018 <sup>23</sup>    | 1 | 2+ | BC      | Dako 73-10 | Avelumab   | 10 mg/kg Q2W        | 2.0(0.5-12.5)  | 10.0(6.0-15.2)   | NR           | NR             |
| Disis,2019 <sup>24</sup>    | 1 | 2+ | OC      | Dako 73-10 | Avelumab   | 10 mg/kg Q2W        | 2.8 (0.5-27.4) | 26.6 (16-38)     | 2.6(1.4-2.8) | 11.2(8.7-15.4) |
| Doi,2018 <sup>25</sup>      | 1 | 2+ | GC/GEJC | Dako 73-10 | Avelumab   | 10 mg/kg Q2W        | 2.7(0.5-21.4)  | 19.3(0.4-22.9)   | 2.4(1.4-2.8) | 9.1(7.2-11.2)  |
| Gulley,2017 <sup>26</sup>   | 1 | 2+ | LC      | Dako 73-10 | Avelumab   | 10 mg/kg Q2W        | 3.1            | 8.8              | 2.9(2.1-3.4) | 8.4(7.3-10.6)  |
| Hassan,2019 <sup>27</sup>   | 1 | 2+ | Me      | Dako 73-10 | Avelumab   | 10 mg/kg Q2W        | 2.8 (0.9-28.1) | 24.8 (16.8-27.8) | 4.1(1.4-6.2) | 10.7(6.4-20.2) |
| Heery,2017 <sup>28</sup>    | 1 | 2+ | ST      | NR         | Avelumab   | 1,3,10,20 mg/kg Q2W | 3.0            | 22.2             | NR           | NR             |
| Kaufman,2018 <sup>29</sup>  | 2 | 2+ | MCC     | Dako 73-10 | Avelumab   | 10 mg/kg Q2W        | 4.3            | 16.4(12.1-25.4)  | 2.7(1.4-6.9) | 12.9(7.5-N)    |
| Keilholz,2019 <sup>30</sup> | 1 | 2+ | MC      | Dako 73-10 | Avelumab   | 10 mg/kg Q2W        | 3.2(0.5-27.2)  | 24.2(16.1-31.5)  | 3.1(1.4-6.3) | 17.2(6.6-N)    |
| Mego,2019 <sup>31</sup>     | 2 | 2+ | GCC     | NR         | Avelumab   | 10 mg/kg Q2W        | NR             | 2.6(0.3-14.4)    | 0.9(0.5-1.9) | 2.7(1.0-3.3)   |
| Patel,2017 <sup>32</sup>    | 1 | 2+ | UC      | Dako 73-10 | Avelumab   | 10 mg/kg Q2W        | 3.0            | 9.9              | 1.6(1.5-2.5) | 6.5(4.8-9.5)   |
| Tourneau,2018 <sup>33</sup> | 1 | 2+ | AdC     | Dako 73-10 | Avelumab   | 10 mg/kg Q2W        | 3.4 (0.5-24.8) | 16.5 (11.7-27.6) | 2.6(1.4-4.0) | 10.6(7.4-15.0) |
| Migden,2018 <sup>34</sup>   | 1 | 1+ | CC      | NR         | Cemiplimab | 3mg/kg Q2W          | <12.0          | 11.0(1.1-17.0)   | NR           | NR             |
| Migden,2018 <sup>34</sup>   | 2 | 1+ | CC      | NR         | Cemiplimab | 3mg/kg Q2W          | <24.0          | 7.9              | NR           | NR             |

|                              |     |    |     |               |            |              |               |                |                 |                |
|------------------------------|-----|----|-----|---------------|------------|--------------|---------------|----------------|-----------------|----------------|
| Antonia,2018 <sup>35</sup>   | 3   | 1+ | LC  | Ventana SP263 | Durvalumab | 10 mg/kg Q2W | 9.4(0.2-12.6) | 25.2(0.2-43.1) | 17.2(13.1-23.9) | N(34.7-N)      |
| Antonia,2019 <sup>36</sup>   | 1/2 | 1+ | LC  | Ventana SP263 | Durvalumab | 10 mg/kg Q2W | 3.5           | 40.1(0.3-52.2) | 1.7(1.4-2.6)    | 12.4(9.3-15.2) |
| Garassino,2018 <sup>37</sup> | 2   | 3+ | LC  | Ventana SP263 | Durvalumab | 10 mg/kg Q2W | 8.2(3.9-19.3) | 6.7            | NR              | NR             |
| Massard,2016 <sup>38</sup>   | 1/2 | 2+ | UC  | Ventana SP263 | Durvalumab | 10 mg/kg Q2W | 1.9(0.4-12.6) | 4.3(0.3-14.8)  | NR              | NR             |
| Necchi,2019 <sup>39</sup>    | 2   | 1+ | GCC | Ventana SP142 | Durvalumab | 1500 mg Q4W  | NR            | 7.5            | 1.5             | 3.1            |
| Powles,2017 <sup>40</sup>    | 1/2 | 2  | UC  | Ventana SP263 | Durvalumab | 10 mg/kg Q2W | 2.8(0.4-12.5) | 5.8(0.4-25.9)  | 1.5(1.4-1.9)    | 18.2(8.1-N)    |
| Segal,2019 <sup>41</sup>     | 1/2 | 2+ | HNC | Ventana SP263 | Durvalumab | 10 mg/kg Q2W | 2.8(0.5-12.6) | 43.0(1.4-49.2) | 1.4(1.4-1.5)    | 8.4(5.7-12.3)  |
| Siu,2018 <sup>42</sup>       | 2   | 1+ | HNC | Ventana SP263 | Durvalumab | 10 mg/kg Q2W | NR            | 6.0 (0.3-18.0) | 1.9(1.8-2.8)    | 6.0(0.3-18.0)  |
| Zandberg,2019 <sup>43</sup>  | 2   | 1+ | HNC | Ventana SP263 | Durvalumab | 10 mg/kg Q2W | 3.5(0.3-12.2) | 6.1(0.2-24.3)  | 2.1(1.9-3.7)    | 7.1(4.9-9.9)   |
| Amaria,2018 <sup>44</sup>    | 2   | 1  | M   | NR            | Nivolumab  | 3 mg/kg Q2W  | NR            | 15.0(5.8-22.6) | NR              | NR             |
| Ansell,2015 <sup>45</sup>    | 1   | 3+ | L   | 405.9A11      | Nivolumab  | 3 mg/kg Q2W  | 9             | 10.0(0.0-18.8) | NR              | NR             |
| Ansell,2019 <sup>46</sup>    | 2   | 2+ | L   | 405.9A11      | Nivolumab  | 3 mg/kg Q2W  | NR            | 7.5(0.1-25.0)  | 1.9(1.7-1.9)    | 12.2(7.7-19.0) |
| Antonia,2016 <sup>47</sup>   | 1/2 | 2+ | LC  | Dako 28-8     | Nivolumab  | 3 mg/kg Q2W  | 2.6           | 6.6            | 1.4(1.4-1.9)    | 4.4(3.0-9.3)   |
| Armand,2018 <sup>48</sup>    | 2   | 3+ | L   | NR            | Nivolumab  | 3 mg/kg Q2W  | NR            | 18.0           | 14.7(11.3-18.5) | NR             |

|                                |   |    |     |           |           |                      |               |                |               |                 |
|--------------------------------|---|----|-----|-----------|-----------|----------------------|---------------|----------------|---------------|-----------------|
| Ascierto,2018 <sup>49</sup>    | 3 | 1  | M   | Dako 28-2 | Nivolumab | 3 mg/kg Q2W          | NR            | >38.4          | 5.1(3.5-12.2) | 37.5(25.5-N)    |
| Ben-ami,2017 <sup>50</sup>     | 2 | 2+ | S   | NR        | Nivolumab | 3 mg/kg Q2W          | 2.5(1.0-3.0)  | NR             | 1.8(0.8-N)    | NR              |
| Borghaei,2015 <sup>51</sup>    | 3 | 2+ | LC  | Dako 28-8 | Nivolumab | 3 mg/kg Q2W          | NR            | >17.2          | 2.3(2.2-3.3)  | 12.2(9.7-15.0)  |
| Brahmer,2012 <sup>52</sup>     | 1 | 1+ | M   | NR        | Nivolumab | 0.3,1,3,10 mg/kg Q2W | 3.0(0.5-27.8) | NR             | NR            | NR              |
| Brahmer,2012 <sup>52</sup>     | 1 | 1+ | RC  | NR        | Nivolumab | 0.3,1,3,10 mg/kg Q2W | 3.0(0.5-27.8) | NR             | NR            | NR              |
| Brahmer,2012 <sup>52</sup>     | 1 | 1+ | LC  | NR        | Nivolumab | 0.3,1,3,10 mg/kg Q2W | 3.0(0.5-27.8) | NR             | NR            | NR              |
| Brahmer,2012 <sup>52</sup>     | 1 | 1+ | OC  | NR        | Nivolumab | 0.3,1,3,10 mg/kg Q2W | 3.0(0.5-27.8) | NR             | NR            | NR              |
| Brahmer,2015 <sup>53</sup>     | 3 | 1+ | LC  | Dako 28-8 | Nivolumab | 3 mg/kg Q2W          | 6.0(0.8-36.0) | >11.0          | 3.5(2.1-4.9)  | 9.2(7.3-13.3)   |
| Carbone,2017 <sup>54</sup>     | 3 | 1  | LC  | Dako 28-8 | Nivolumab | 3 mg/kg Q2W          | 3.7(0-26.9+)  | 13.7           | 4.2(3.0-5.6)  | 14.4(11.7-17.4) |
| Carneiro,2019 <sup>55</sup>    | 2 | 1+ | AdC | NR        | Nivolumab | 240 mg Q2W           | 1.0           | 4.5(0.1-25.6)  | 1.8(0.1-4.3)  | NR              |
| D'angelo,2018 <sup>56</sup>    | 2 | 2+ | S   | NR        | Nivolumab | 3 mg/kg Q2W          | 2.3           | 13.6           | 1.7(1.4-4.3)  | 10.7(5.5-19.4)  |
| El-Khoueiry,2017 <sup>57</sup> | 1 | 2+ | LC  | NR        | Nivolumab | 0.3,1,3,10 mg/kg Q2W | NR            | <45.0          | NR            | NR              |
| El-Khoueiry,2017 <sup>57</sup> | 2 | 2+ | LC  | NR        | Nivolumab | 3 mg/kg Q2W          | NR            | <45.0          | 4.0(2.9-5.4)  | NR              |
| Ferris,2016 <sup>58</sup>      | 3 | 2  | HNC | Dako 28-8 | Nivolumab | 3 mg/kg Q2W          | 1.9           | 5.1(0.0-16.8)  | 2.0(1.9-2.1)  | 7.5(5.5-9.1)    |
| Flippot,2019 <sup>59</sup>     | 2 | 2+ | RC  | NR        | Nivolumab | 3 mg/kg Q2W          | 4.7(0.5-24.2) | 21.9           | NR            | NR              |
| Forde,2018 <sup>60</sup>       | 2 | Ne | LC  | NR        | Nivolumab | 3 mg/kg Q2W          | NR            | 12.0(0.8-19.7) | NR            | NR              |

|                              |     |    |         |           |           |                  |               |                 |               |                 |
|------------------------------|-----|----|---------|-----------|-----------|------------------|---------------|-----------------|---------------|-----------------|
| Fujimoto,2019 <sup>61</sup>  | 2   | 2+ | LC      | NR        | Nivolumab | 3 mg/kg Q2W      | NR            | 14.2(2.7-32.1)  | 7.4(1.8-16.8) | 15.6(14.4-N)    |
| Gettinger,2015 <sup>62</sup> | 1   | 2+ | LC      | NR        | Nivolumab | 1,3,10 mg/kg Q2W | NR            | 39.0(32.0-66.0) | 2.3(1.8-16.8) | 15.6(14.4-N)    |
| Gettinger,2016 <sup>63</sup> | 1   | 1  | LC      | NR        | Nivolumab | 3 mg/kg Q2W      | NR            | 14.3(0.2-30.1)  | 3.6(0.1-28.0) | 19.4(0.2-35.8)  |
| Hamanishi,2015 <sup>64</sup> | 2   | 3+ | OC      | 27A2      | Nivolumab | 1,3 mg/kg Q2W    | 3.5(1.0-12.0) | 11.0(3.0-32.0)  | 3.5(1.7-3.9)  | 20.0(7.0-N)     |
| Hida,2017 <sup>65</sup>      | 2   | 2+ | LC      | Dako 28-8 | Nivolumab | 3 mg/kg Q2W      | 3.6(0.5-29.3) | 16.3(1.7-29.3)  | 4.2(1.4-7.1)  | 16.3(12.4-25.4) |
| Hodi,2018 <sup>66</sup>      | 3   | 1  | M       | Dako 28-8 | Nivolumab | 3 mg/kg Q2W      | 7.5(0.5-19.0) | 36.0            | 6.9(5.1-10.2) | 36.9(28.3-N)    |
| Janjigian,2018 <sup>67</sup> | 1/2 | 2+ | GEJC    | NR        | Nivolumab | 3 mg/kg Q2W      | NR            | 28.0(17.0-35.0) | 1.4(1.2-1.5)  | 6.2(3.4-12.4)   |
| Kang,2017 <sup>68</sup>      | 3   | 3+ | GC/GEJC | Dako 28-8 | Nivolumab | 3 mg/kg Q2W      | 1.9           | 8.9             | 1.6(1.5-2.3)  | 5.3(4.6-6.4)    |
| Katsuya,2019 <sup>69</sup>   | 2   | 2+ | TC      | NR        | Nivolumab | 3 mg/kg Q2W      | 6.0(0.8-24.8) | 14.1(2.4-17.5)  | 3.8(1.9-7.0)  | 14.1(11.1-N)    |
| Kudo,2017 <sup>70</sup>      | 2   | 1+ | EC      | NR        | Nivolumab | 3 mg/kg Q2W      | 2.3(0.8-7.5)  | 10.8            | 1.5(1.4-2.8)  | 10.8(7.4-13.3)  |
| Larkin,2018 <sup>71</sup>    | 3   | 2+ | M       | NR        | Nivolumab | 3 mg/kg Q2W      | 4.7           | NR              | 3.1(2.3-3.5)  | 16.4(12.9-20.3) |
| Lee,2018 <sup>72</sup>       | 2   | 2+ | LC      | NR        | Nivolumab | 3 mg/kg Q2W      | 2.5(0.0-22.5) | 18              | 2.8(1.4-5.7)  | 13.9(10.8-18.5) |
| Lesokhin,2016 <sup>73</sup>  | 1   | 3+ | HC      | 405.9A11  | Nivolumab | 1,3 mg/kg Q2W    | NR            | 16.7(0.4-33.0+) | NR            | NR              |
| Long,2018 <sup>74</sup>      | 2   | 2+ | M       | NR        | Nivolumab | 3 mg/kg Q2W      | NR            | 21.0            | NR            | NR              |
| Ma,2018 <sup>75</sup>        | 2   | 1+ | NC      | 22C3      | Nivolumab | 3 mg/kg Q2W      | 2.3           | 12.5(2.2-22.0)  | 2.8(1.8-7.4)  | 17.1(10.9-N)    |

|                                    |     |    |            |           |           |                    |               |                 |               |                 |
|------------------------------------|-----|----|------------|-----------|-----------|--------------------|---------------|-----------------|---------------|-----------------|
| Ma,2019 <sup>76</sup>              | 1/2 | 2+ | NC         | NR        | Nivolumab | 3 mg/kg Q2W        | 4.2(0.5-26.3) | 7.5(0.8-24.7)   | 3.5(1.8-5.5)  | NR              |
| Maruyama,2017 <sup>77</sup>        | 2   | 3+ | L          | NR        | Nivolumab | 3 mg/kg Q2W        | 7.0(1.4-10.6) | 9.8(6.0-11.1)   | NR            | NR              |
| McDermott,2015 <sup>78</sup>       | 1   | 2+ | RC         | NR        | Nivolumab | 1,10 mg/kg Q2W     | NR            | 45.2(25.9-57.9) | 7.3(3.6-10.9) | 22.4(12.5-N)    |
| Morris,2017 <sup>79</sup>          | 2   | 1+ | AC         | E1L3N     | Nivolumab | 3 mg/kg Q2W        | NR            | 10.1            | 4.1(3.0-7.9)  | 11.5(7.1-N)     |
| Motzer,2015 <sup>80</sup>          | 3   | 1+ | RC         | Dako 28-8 | Nivolumab | 3 mg/kg Q2W        | 5.5(0.1-29.6) | >14.0           | 4.6(3.7-5.4)  | 25.0(21.8-N)    |
| Motzer,2015 <sup>81</sup>          | 2   | 2+ | RC         | Dako 28-8 | Nivolumab | 0.3,2,10 mg/kg Q3W | 5.3(0.8-24.0) | <33.0           | 2.7(1.9-3.0)  | 18.2(16.2-24.0) |
| Nishio,2017 <sup>82</sup>          | 2   | 2+ | LC         | Dako 28-8 | Nivolumab | 3 mg/kg Q2W        | NR            | 16.6(0.9-31.9)  | 2.8(1.4-3.4)  | 17.1(13.3-23.0) |
| Okada,2019 <sup>83</sup>           | 2   | 1+ | Me         | Dako 28-8 | Nivolumab | 240 mg Q2W         | 6.8(0.0-19.1) | 16.8(1.8-20.2)  | 6.1(2.9-9.9)  | 17.3(11.5-N)    |
| Omuro,2018 <sup>84</sup>           | 1   | 2  | GBM        | Dako 28-8 | Nivolumab | 3 mg/kg Q2W        | 2.3(1.0-33.7) | 33.7            | 1.9(1.3-4.6)  | 10.4(4.1-22.8)  |
| Ornstein,2019 <sup>85</sup>        | 2   | 2+ | RC         | NR        | Nivolumab | 240 mg Q2W         | NR            | 12              | 8.0(5.4-N)    | NR              |
| Overman,2017 <sup>86</sup>         | 2   | 1+ | dMMR/MSI-H | Dako 28-8 | Nivolumab | 3 mg/kg Q2W        | NR            | 12              | 14.3(4.3-N)   | NR              |
| Quispel-Janssen,2018 <sup>87</sup> | 2   | 2+ | Me         | NR        | Nivolumab | 3 mg/kg Q2W        | 2.8           | 27.5            | 2.6(2.2-5.5)  | 11.8(9.7-15.7)  |
| Ramchandren,2019 <sup>88</sup>     | 2   | 1  | L          | Dako 28-8 | Nivolumab | 240 mg Q2W         | NR            | 11.1(1.2-16.4)  | NR            | NR              |
| Rizvi,2015 <sup>89</sup>           | 2   | 2+ | LC         | Dako 28-8 | Nivolumab | 3 mg/kg Q2W        | 2.3           | >11.0           | 1.9(1.8-3.2)  | 8.2(6.1-10.9)   |
| Scherpereel,2019 <sup>90</sup>     | 2   | 2+ | Me         | Dako 28-8 | Nivolumab | 3 mg/kg Q2W        | NR            | 20.1            | 4.0(2.8-5.7)  | 11.9(6.7-17.7)  |
| Sharma,2019 <sup>91</sup>          | 1/2 | 2+ | UC         | Dako 28-8 | Nivolumab | 3 mg/kg Q2W        | 3.5           | >37.7           | 2.8(1.5-5.3)  | 9.9(7.3-21.1)   |

|                              |     |    |     |           |           |                          |                |                |              |                 |
|------------------------------|-----|----|-----|-----------|-----------|--------------------------|----------------|----------------|--------------|-----------------|
| Sharma,2017 <sup>92</sup>    | 2   | 1+ | UC  | Dako 28-8 | Nivolumab | 3 mg/kg Q2W              | NR             | 7              | 2.0(1.9-2.6) | 8.7(6.1-N)      |
| Teraoka,2017 <sup>93</sup>   | 2   | 3+ | LC  | Dako 22C3 | Nivolumab | 3 mg/kg Q2W              | NR             | NR             | NR           | NR              |
| Topalian,2012 <sup>94</sup>  | 1   | 1+ | M   | 5H1       | Nivolumab | 0.1,0.3,1,3,10 mg/kg Q2W | NR             | NR             | NR           | NR              |
| Topalian,2012 <sup>94</sup>  | 1   | 1+ | LC  | 5H1       | Nivolumab | 0.1,0.3,1,3,10 mg/kg Q2W | NR             | NR             | NR           | NR              |
| Topalian,2012 <sup>94</sup>  | 1   | 1+ | RC  | 5H1       | Nivolumab | 0.1,0.3,1,3,10 mg/kg Q2W | NR             | NR             | NR           | NR              |
| Topalian,2012 <sup>94</sup>  | 1   | 1+ | PC  | 5H1       | Nivolumab | 0.1,0.3,1,3,10 mg/kg Q2W | NR             | NR             | NR           | NR              |
| Topalian,2012 <sup>94</sup>  | 1   | 1+ | CRC | 5H1       | Nivolumab | 0.1,0.3,1,3,10 mg/kg Q2W | NR             | NR             | NR           | NR              |
| Topalian,2014 <sup>95</sup>  | 1   | 2+ | M   | NR        | Nivolumab | 1,3,10 mg/kg Q2W         | NR             | NR             | 3.7(1.9-9.1) | 16.8(12.5-31.6) |
| Ueno,2019 <sup>96</sup>      | 1   | 2+ | BTC | Dako 28-8 | Nivolumab | 240 mg, Q2W              | NR             | 5.1            | 1.4(1.4-1.4) | 5.2(4.5-8.7)    |
| Voorwerk,2019 <sup>97</sup>  | 2   | 1+ | BC  | Dako 22C3 | Nivolumab | 3 mg/kg Q2W              | NR             | 19.9           | NR           | NR              |
| Weber,2013 <sup>98</sup>     | 1   | 2+ | M   | Dako 28-8 | Nivolumab | 1,3,10 mg/kg Q2W         | NR             | 8.1            | NR           | NR              |
| Weber,2016 <sup>99</sup>     | 1/2 | 2+ | M   | NR        | Nivolumab | 3 mg/kg Q2W              | NR             | 16.0           | NR           | NR              |
| Wu,2019 <sup>100</sup>       | 3   | 1+ | LC  | NR        | Nivolumab | 3 mg/kg Q2W              | 2.5            | 10.4(0.2-21.1) | 2.8(2.4-3.4) | 12.0(10.4-14.0) |
| Yamamoto,2017 <sup>101</sup> | 1   | 1+ | ST  | 27A2      | Nivolumab | 1,3,10,20 mg/kg Q2W      | NR             | NR             | NR           | NR              |
| Yamazaki,2017 <sup>102</sup> | 2   | 1  | M   | NR        | Nivolumab | 3 mg/kg Q2W              | 11.9(0.5-21.0) | 18.8(2.0-21.5) | 5.9          | NR              |



|                             |   |    |     |              |               |                        |               |                 |              |                 |
|-----------------------------|---|----|-----|--------------|---------------|------------------------|---------------|-----------------|--------------|-----------------|
| Adams,2019 <sup>103</sup>   | 2 | 1+ | BC  | Dako<br>22C3 | Pembrolizumab | 200 mg Q3W             | 3.5(0.0-22.9) | 12.3(0.9-23.5)  | 2.0(1.9-2.0) | 9.0(7.7-11.2)   |
| Adams,2019 <sup>104</sup>   | 2 | 1  | BC  | Dako<br>22C3 | Pembrolizumab | 200 mg Q3W             | 1.9(0.0-24.7) | 9.6(0.1-25.7)   | 2.1(2.0-2.2) | 18.0(12.9-23.0) |
| Adra,2017 <sup>105</sup>    | 2 | 2+ | GCC | Dako<br>22C3 | Pembrolizumab | 200 mg Q3W             | 1.5(0.8-6.0)  | NR              | NR           | NR              |
| Alley,2017 <sup>106</sup>   | 1 | 1+ | Me  | Dako<br>22C3 | Pembrolizumab | 10 mg/kg Q2W           | 5.1           | 18.7(10.4-24.0) | 5.4(3.4-7.5) | 18.0(9.4-N)     |
| Armand,2016 <sup>107</sup>  | 1 | 2+ | L   | Dako<br>22C3 | Pembrolizumab | 10 mg/kg Q2W           | NR            | 17.6(10.6-22.5) | NR           | NR              |
| Armand,2019 <sup>108</sup>  | 2 | 2+ | L   | NR           | Pembrolizumab | 200 mg Q3W             | NR            | NR              | NR           | NR              |
| Balar,2017 <sup>109</sup>   | 2 | 1  | UC  | Dako<br>22C3 | Pembrolizumab | 200 mg Q3W             | 3.0(0-16.0)   | 5.0             | 2.0(2.0-3.0) | NR              |
| Barta,2019 <sup>110</sup>   | 2 | 2+ | L   | Dako<br>22C3 | Pembrolizumab | 200 mg Q3W             | NR            | 5.9             | 3.2(1.2-3.7) | 10.6(3.2-100.0) |
| Bauml,2017 <sup>111</sup>   | 2 | 3+ | HNC | Dako<br>22C3 | Pembrolizumab | 200 mg Q3W             | 3.0(0.0-13.4) | 7.0(0.0-17.0)   | 2.1(2.1-2.1) | 8.0(6.0-11.0)   |
| Carlino,2018 <sup>112</sup> | 3 | 1  | M   | NR           | Pembrolizumab | 10 mg/kg Q2W or<br>Q3W | 6.5(0.0-27.0) | 33.9            | 6.6(4.4-9.8) | NR              |
| Chen,2017 <sup>113</sup>    | 2 | 1+ | L   | NR           | Pembrolizumab | 200 mg Q3W             | 8.3(0.0-15.0) | 10.1(1.0-15.0)  | NR           | NR              |
| Cho,2018 <sup>114</sup>     | 2 | 2+ | TC  | Dako<br>22C3 | Pembrolizumab | 200 mg Q3W             | NR            | 14.9            | 6.1(5.1-7.1) | NR              |
| Chung,2019 <sup>115</sup>   | 2 | 2+ | CeC | Dako<br>22C3 | Pembrolizumab | 200 mg Q3W             | 2.9(0.0-22.1) | 10.2(0.6-22.7)  | 2.1(2.0-2.2) | 9.4(7.7-13.1)   |
| Cohen,2018 <sup>116</sup>   | 1 | 1+ | SGC | Dako<br>22C3 | Pembrolizumab | 10 mg/kg Q2W           | NR            | 20.0(2.0-35.0)  | 4.0(2.0-5.0) | 13.0(6.0-N)     |

|                              |     |    |         |              |               |                        |               |                 |               |                 |
|------------------------------|-----|----|---------|--------------|---------------|------------------------|---------------|-----------------|---------------|-----------------|
| Cohen,2019 <sup>117</sup>    | 3   | 1+ | HNC     | Dako<br>22C3 | Pembrolizumab | 200 mg Q3W             | NR            | 8.4             | 2.1(2.1-2.3)  | 8.4(6.4-9.4)    |
| Doi,2018 <sup>118</sup>      | 1   | 1+ | EC      | Dako<br>22C3 | Pembrolizumab | 10 mg/kg Q2W           | NR            | 7.0(1.0-33.0)   | 1.8(1.7-2.9)  | 7.0(4.3-17.7)   |
| Feun,2019 <sup>119</sup>     | 2   | 1+ | LC      | Dako<br>22C3 | Pembrolizumab | 200 mg Q3W             | NR            | 17.0            | 4.5(2.0-7.0)  | 13.0(7.0-N)     |
| Fradet,2019 <sup>120</sup>   | 3   | 2+ | UC      | Dako<br>22C3 | Pembrolizumab | 200 mg Q3W             | 3.5(0.0-20.0) | 27.7            | 2.1(2.0-2.2)  | 10.1(8.0-12.3)  |
| Frenel,2017 <sup>121</sup>   | 1   | 2+ | CeC     | Dako<br>22C3 | Pembrolizumab | 10 mg/kg Q2W           | NR            | 11.0(1.3-32.2)  | 2.0(2.0-3.0)  | 11.0(4.0-15.0)  |
| Fuchs,2018 <sup>122</sup>    | 2   | 3+ | GC/GEJC | Dako<br>22C3 | Pembrolizumab | 200 mg Q3W             | 2.1(0.0-21.4) | 5.8(0.5-24.7)   | 2.0(2.0-2.1)  | 5.6(4.3-6.9)    |
| Gadgeel,2018 <sup>123</sup>  | 2   | 2  | LC      | Dako<br>22C3 | Pembrolizumab | 200 mg Q3W             | 3.0(0.3-19.5) | 14.6            | 1.4(1.3-2.8)  | 9.6(7.0-12.0)   |
| Giaccone,2018 <sup>124</sup> | 2   | 2+ | TC      | Dako<br>22C3 | Pembrolizumab | 200 mg Q3W             | 4.0(0.8-26.3) | 20.0            | 4.2(2.9-10.3) | 24.9(15.5-N)    |
| Goldberg,2016 <sup>125</sup> | 2   | 1+ | LC      | NR           | Pembrolizumab | 10 mg/kg Q2W           | NR            | 6.8             | NR            | 7.7(3.5-N)      |
| Hamid,2017 <sup>126</sup>    | 2   | 3+ | M       | NR           | Pembrolizumab | 2,10 mg/kg Q2W         | 4.3(0.0-32.9) | 28.1(24.1-35.5) | NR            | NR              |
| Hamid,2019 <sup>127</sup>    | 1   | 1+ | M       | Dako<br>22C3 | Pembrolizumab | 2,10 mg/kg Q3W,<br>Q2W | 5.6(0.0-67.0) | 55.0(48.0-69.0) | 8.3(5.8-11.1) | 23.8(20.2-30.4) |
| Hansen,2018 <sup>128</sup>   | 1   | 1+ | PC      | NR           | Pembrolizumab | 10 mg/kg Q2W           | NR            | 7.9(1.4-30.3)   | 3.5(1.7-6.5)  | 7.9(6.5-N)      |
| Herbst,2019 <sup>129</sup>   | 2/3 | 1+ | LC      | Dako<br>22C3 | Pembrolizumab | 2,10 mg/kg Q3W         | 3.5           | 31.0(23.0-41.0) | 3.9(3.1-4.1)  | 10.4(9.4-11.9)  |
| Hsu,2017 <sup>130</sup>      | 1   | 1+ | NC      | Dako<br>22C3 | Pembrolizumab | 10 mg/kg Q2W           | NR            | 20.0(4.8-22.1+) | 6.5(3.6-13.4) | 16.5(10.1-N)    |
| Huang,2019 <sup>131</sup>    | 1   | Ne | M       | Dako         | Pembrolizumab | 200 mg                 | NR            | 25.0            | NR            | NR              |

|                               |   |    |     |              |               |                             |               |                 |                |                 |
|-------------------------------|---|----|-----|--------------|---------------|-----------------------------|---------------|-----------------|----------------|-----------------|
|                               |   |    |     | 22C3         |               |                             |               |                 |                |                 |
| Kluger,2019 <sup>132</sup>    | 2 | 1+ | M   | Dako<br>22C3 | Pembrolizumab | 10 mg/kg Q2W                | NR            | 34.0(28.0-43.0) | 2.0(2.0-N)     | 17.0(10.0-N)    |
| Leighl,2019 <sup>133</sup>    | 1 | 1  | LC  | Dako<br>22C3 | Pembrolizumab | 2,10 mg/kg Q3W;<br>Q2W      | 3.3           | 34.5            | 10.3(8.3-14.7) | 22.3(17.1-31.5) |
| Levy,2019 <sup>134</sup>      | 2 | 2  | LC  | Dako<br>22C3 | Pembrolizumab | 200 mg Q3W                  | 6.0(0.8-15.0) | 12.2            | 4.0            | NR              |
| Long,2019 <sup>135</sup>      | 3 | 1  | M   | Dako<br>22C3 | Pembrolizumab | 200 mg Q3W                  | 7.2           | NR              | 4.9(2.9-6.8)   | NR              |
| Matulonis,2019 <sup>136</sup> | 2 | 2+ | OC  | Dako<br>22C3 | Pembrolizumab | 200 mg Q3W                  | NR            | 16.9(8.5-18.5)  | 2.1(2.1-2.2)   | N(16.8-N)       |
| Mehra,2018 <sup>137</sup>     | 1 | 2+ | HNC | Dako<br>22C3 | Pembrolizumab | 10 mg/kg Q2W;<br>200 mg Q3W | 3.5(0.0-26.8) | 9.0(0.2-32.0)   | 2.1(1.9-2.1)   | 8.0(6.0-10.0)   |
| Mok,2019 <sup>138</sup>       | 3 | 1  | LC  | Dako<br>22C3 | Pembrolizumab | 200 mg Q3W                  | NR            | 12.8            | NR             | NR              |
| Muro,2016 <sup>139</sup>      | 1 | 1+ | GC  | Dako<br>22C3 | Pembrolizumab | 10 mg/kg Q2W                | NR            | 10.8            | 1.9(1.8-5.7)   | 11.4(3.1-N)     |
| Nanda,2016 <sup>140</sup>     | 1 | 1+ | BC  | Dako<br>22C3 | Pembrolizumab | 10 mg/kg Q2W                | 2.0(0.0-17.7) | 10.0(0.4-19.5)  | 1.9(1.7-5.5)   | 11.2(5.3-N)     |
| Nghiem2019 <sup>141</sup>     | 2 | 1  | MCC | Dako<br>22C3 | Pembrolizumab | 2 mg/kg Q3W                 | 6.6(0.0-23.6) | 14.9(0.4-36.4+) | 16.8(4.6-N)    | N(26.0-N)       |
| Nishio,2018 <sup>142</sup>    | 1 | 2+ | LC  | Dako<br>22C3 | Pembrolizumab | 10 mg/kg Q3W                | NR            | 19.2(1.9-34.6)  | 3.9(2.0-6.2)   | 19.2(8.0-26.7)  |
| Ott,2017 <sup>143</sup>       | 1 | 2+ | AC  | Dako<br>22C3 | Pembrolizumab | 10 mg/kg Q2W                | 3.0(0.0-15.0) | 10.6(0.3-15.0)  | 3.0(1.7-7.3)   | 9.3(5.9-N)      |
| Ott,2017 <sup>144</sup>       | 1 | 2+ | LC  | Dako         | Pembrolizumab | 10 mg/kg Q2W                | NR            | 9.8(0.5-24.0)   | 1.9(1.7-5.9)   | 9.7(4.1-N)      |

|                             |   |    |     |              |               |              |               |                 |              |              |
|-----------------------------|---|----|-----|--------------|---------------|--------------|---------------|-----------------|--------------|--------------|
|                             |   |    |     | 22C3         |               |              |               |                 |              |              |
| Ott,2017 <sup>145</sup>     | 1 | 1+ | UrC | Dako<br>22C3 | Pembrolizumab | 10 mg/kg Q2W | NR            | 19.1(0.7-23.6)  | 1.8(1.6-2.7) | N(4.3-N)     |
| Ott,2019 <sup>146</sup>     | 1 | 1+ | BTC | Dako<br>22C3 | Pembrolizumab | 10 mg/kg Q2W | NR            | NR              | 1.8          | 6.2          |
| Ott,2019 <sup>146</sup>     | 1 | 1+ | NeC | Dako<br>22C3 | Pembrolizumab | 10 mg/kg Q2W | NR            | NR              | 5.4          | N            |
| Ott,2019 <sup>146</sup>     | 1 | 1+ | CRC | Dako<br>22C3 | Pembrolizumab | 10 mg/kg Q2W | NR            | NR              | 1.8          | 5.3          |
| Ott,2019 <sup>146</sup>     | 1 | 1+ | GBM | Dako<br>22C3 | Pembrolizumab | 10 mg/kg Q2W | NR            | NR              | 2            | 26.6         |
| Ott,2019 <sup>146</sup>     | 1 | 1+ | S   | Dako<br>22C3 | Pembrolizumab | 10 mg/kg Q2W | NR            | NR              | NR           | NR           |
| Ott,2019 <sup>146</sup>     | 1 | 1+ | NeC | Dako<br>22C3 | Pembrolizumab | 10 mg/kg Q2W | NR            | NR              | NR           | NR           |
| Ott,2019 <sup>146</sup>     | 1 | 1+ | PaC | Dako<br>22C3 | Pembrolizumab | 10 mg/kg Q2W | NR            | NR              | 1.7          | 3.9          |
| Ott,2019 <sup>146</sup>     | 1 | 1+ | TC  | Dako<br>22C3 | Pembrolizumab | 10 mg/kg Q2W | NR            | NR              | 6.8          | NR           |
| Ott,2019 <sup>146</sup>     | 1 | 1+ | VC  | Dako<br>22C3 | Pembrolizumab | 10 mg/kg Q2W | NR            | NR              | 3.1          | 3.8          |
| Plimack,2017 <sup>147</sup> | 1 | 1+ | UC  | Dako<br>22C3 | Pembrolizumab | 10 mg/kg Q2W | 2.4(0.0-23.6) | 13.0(1.0-26.0)  | 2.0(2.0-4.0) | 13.0(5.0-N)  |
| Reck,2019 <sup>148</sup>    | 3 | 1  | LC  | Dako<br>22C3 | Pembrolizumab | 200 mg Q3W   | 7.9(0.0-28.8) | 25.2(20.4-33.7) | NR           | 30.0(18.3-N) |

|                              |   |    |         |              |               |                 |               |                |              |                    |
|------------------------------|---|----|---------|--------------|---------------|-----------------|---------------|----------------|--------------|--------------------|
| Ribrag,2019 <sup>149</sup>   | 1 | 1+ | My      | Dako<br>22C3 | Pembrolizumab | 10 mg/kg Q2W    | NR            | 19.9(2.0-44.0) | 2.7(1.4-3.7) | 20.0(14.1-<br>N)   |
| Rugo,2018 <sup>150</sup>     | 1 | 1+ | BC      | Dako<br>22C3 | Pembrolizumab | 10 mg/kg Q2W    | NR            | 9.7(0.7-31.8)  | 1.8(1.4-2.0) | 8.6(7.3-<br>11.6)  |
| Seiwert,2016 <sup>151</sup>  | 1 | 1+ | HNC     | Dako<br>22C3 | Pembrolizumab | 10 mg/kg Q2W    | NR            | 14.0           | 2.0(2.0-4.0) | 13.0(5.0-N)        |
| Shah,2018 <sup>152</sup>     | 2 | 3+ | EC      | Dako<br>22C3 | Pembrolizumab | 200 mg Q3W      | 2.0(0.0-17.0) | 5.8(0.2-18.3)  | 2.0(1.9-2.1) | 5.8(4.5-7.2)       |
| Shimizu,2016 <sup>153</sup>  | 1 | 1+ | ST      | Dako<br>22C3 | Pembrolizumab | 2, 10 mg/kg Q2W | 3.0(0.8-4.5)  | NR             | NR           | NR                 |
| Shitara,2018 <sup>154</sup>  | 3 | 2  | GC/GEJC | Dako<br>22C3 | Pembrolizumab | 200 mg Q3W      | 4.4           | 8.5            | 1.5(1.4-2.0) | 9.1(6.2-<br>10.7)  |
| Si,2019 <sup>155</sup>       | 1 | 2  | M       | Dako<br>22C3 | Pembrolizumab | 2 mg/kg Q3W     | NR            | 7.9(5.6-13.1)  | 2.8(2.7-3.5) | 12.1(9.6-N)        |
| Tawbi,2017 <sup>156</sup>    | 2 | 1+ | S       | Dako<br>22C3 | Pembrolizumab | 200 mg Q3W      | NR            | 19.1           | 4.5(2.0-5.3) | 12.3(8.5-<br>18.3) |
| Tawbi,2017 <sup>156</sup>    | 2 | 1+ | S       | Dako<br>22C3 | Pembrolizumab | 200 mg Q3W      | NR            | 16.6           | 4.5(2.0-5.3) | 12.3(8.5-<br>18.3) |
| Varga,2019 <sup>157</sup>    | 1 | 1+ | OC      | Dako<br>22C3 | Pembrolizumab | 10 mg/kg Q2W    | NR            | 15.4(2.3-33.9) | 1.9(1.8-3.5) | 13.8(6.7-<br>18.8) |
| Yamazaki,2017 <sup>158</sup> | 1 | 1+ | M       | Dako<br>22C3 | Pembrolizumab | 2 mg/kg Q3W     | 7.1(0.0-12.8) | 10.3(2.6-12.6) | NR           | NR                 |
| Zhu,2018 <sup>159</sup>      | 2 | 1+ | LC      | Dako<br>22C3 | Pembrolizumab | 200 mg Q3W      | 4.2           | 12.3           | 4.9(3.4-7.2) | 12.9(9.7-<br>15.5) |
| Zinzan,2017 <sup>160</sup>   | 1 | 3+ | L       | Dako<br>22C3 | Pembrolizumab | 10 mg/kg Q2W    | NR            | 11.3(3.4-27.4) | NR           | NR                 |

AC, Anal cancer; BC, Breast cancer; BTC, Biliary tract cancer; CC, Cutaneous cancer; CeC, Cervical cancer; CRC, Colorectal cancer; dMMR/MSI-H, DNA mismatch repair-deficient or microsatellite instability-high; EC, Esophageal cancer; GBM, Glioblastoma; GC, gastric cancer; GCC, Germ cell cancer; GEJC, gastro-esophageal junction cancer; HC, Hematologic cancer, HNC, Head and neck cancer; L, Lymphoma; LC, Lung cancer; M, Melanoma; Me, Mesothelioma; MCC, Merkel cell cancer; My, Myeloma; NC, Nasopharyngeal cancer; NeC, Neuroendocrine cancer; OC, Ovarian cancer; OS, overall survival; PC, Prostate cancer; PaC, Pancreatic cancer; PFS, progression-free survival; RC, Renal cancer; S, Sarcoma; SGC, Salivary Gland cancer; ST, Solid tumor; TC, Thymic cancer; UC, Urothelial cancer; UrC, Uterine cancer; VC, Vulvar cancer; N, not reached; NR, Not reported.

**Supplemental table 2. Basic characteristics included in the objective response analysis.**

| Study                          | No. of patients | Median time to response (range), m | Median duration of response (range), m | CR | PR | OR | PD-L1 positive  |    |    | PD-L1 negative |                 |    |    |    |
|--------------------------------|-----------------|------------------------------------|----------------------------------------|----|----|----|-----------------|----|----|----------------|-----------------|----|----|----|
|                                |                 |                                    |                                        |    |    |    | No. of Patients | CR | PR | OR             | No. of Patients | CR | PR | OR |
| Balar,2017 <sup>1</sup>        | 119             | 2.1(1.8-10.5)                      | 3.7-21.0+                              | 11 | 16 | 27 | 80              | 8  | 11 | 19             | 39              | 3  | 5  | 8  |
| Colevas,2018 <sup>2</sup>      | 32              | NR                                 | 7.4                                    | 0  | 7  | 7  | 25              | 0  | 6  | 6              | 7               | 0  | 1  | 1  |
| Emens,2019 <sup>3</sup>        | 112             | NR                                 | 21.0(3.0-38.0+)                        | 3  | 8  | 11 | 91              | 3  | 8  | 11             | 21              | 0  | 0  | 0  |
| Eng,2019 <sup>4</sup>          | 90              | NR                                 | 4.8(3.8-5.8)                           | 0  | 2  | 2  | 35              | 0  | 1  | 1              | NR              | NR | NR | NR |
| Fehrenbacher,2016 <sup>5</sup> | 144             | NR                                 | 14.3                                   | NR | NR | 31 | 93              | NR | NR | 17             | 51              | NR | NR | 4  |
| Fehrenbacher,2018 <sup>6</sup> | 613             | NR                                 | 23.9                                   | NR | NR | 84 | 347             | NR | NR | 62             | 260             | NR | NR | 20 |
| Horn,2018 <sup>7</sup>         | 81              | 2.7(1.2-11.5)                      | 16.4(7.2-53.4+)                        | 1  | 19 | 20 | 63              | 1  | 17 | 18             | 18              | 0  | 2  | 2  |
| Liu,2019 <sup>8</sup>          | 9               | NR                                 | NR                                     | 1  | 1  | 2  | 8               | 1  | 1  | 2              | 1               | 0  | 0  | 0  |
| Liu,2019 <sup>8</sup>          | 15              | NR                                 | NR                                     | 0  | 2  | 2  | 5               | 0  | 2  | 2              | 10              | 0  | 0  | 0  |
| McDermott,2016 <sup>9</sup>    | 62              | NR                                 | 17.4(7.6-26.9+)                        | 1  | 8  | 9  | 33              | 1  | 5  | 6              | 22              | 0  | 2  | 2  |
| McDermott,2018 <sup>10</sup>   | 103             | NR                                 | NR                                     | 11 | 14 | 25 | 54              | 8  | 7  | 15             | NR              | NR | NR | NR |
| Peters,2017 <sup>11</sup>      | 139             | NR                                 | 9.8(5.6-N)                             | 0  | 30 | 30 | 139             | 0  | 30 | 30             | NR              | NR | NR | NR |
| Peters,2017 <sup>11</sup>      | 268             | NR                                 | N(8.3-N)                               | 3  | 49 | 52 | 268             | 3  | 49 | 52             | NR              | NR | NR | NR |
| Peters,2017 <sup>11</sup>      | 252             | NR                                 | 11.8(6.9-N)                            | 3  | 42 | 45 | 252             | 3  | 42 | 45             | NR              | NR | NR | NR |
| Petrylak,2018 <sup>12</sup>    | 95              | NR                                 | 22.1(2.8-41.0+)                        | 9  | 16 | 25 | 50              | 8  | 12 | 20             | 44              | 1  | 4  | 5  |
| Powles,2017 <sup>13</sup>      | 467             | NR                                 | 21.7                                   | 16 | 46 | 62 | 116             | 8  | 18 | 26             | 351             | 8  | 28 | 36 |
| Pujol,2019 <sup>14</sup>       | 43              | NR                                 | NR                                     | 0  | 1  | 1  | NR              | NR | NR | NR             | NR              | NR | NR | NR |
| Rosenberg,2016 <sup>15</sup>   | 310             | 2.1                                | 2.0-13.7+                              | 16 | 42 | 58 | 207             | 13 | 24 | 37             | 103             | 2  | 6  | 8  |
| Spigel,2018 <sup>16</sup>      | 31              | 2.0                                | 11.5                                   | NR | NR | 10 | 31              | NR | NR | 10             | NR              | NR | NR | NR |
| Spigel,2018 <sup>16</sup>      | 92              | 2.6                                | 17                                     | NR | NR | 19 | 92              | NR | NR | 19             | NR              | NR | NR | NR |





|                                |     |               |                 |    |     |     |     |    |    |    |     |    |    |    |
|--------------------------------|-----|---------------|-----------------|----|-----|-----|-----|----|----|----|-----|----|----|----|
| Powles,2017 <sup>40</sup>      | 191 | 1.4(1.2-7.2)  | 0.9+-19.9+      | 7  | 27  | 34  | 98  | 4  | 23 | 27 | 79  | 2  | 2  | 4  |
| Segal,2019 <sup>41</sup>       | 62  | 2.7(1.2-5.5)  | 12.4(3.5-20.5+) | 0  | 4   | 4   | 20  | 0  | 3  | 3  | 39  | 0  | 1  | 1  |
| Siu,2018 <sup>42</sup>         | 65  | 4.1(2.0-6.0)  | NR              | 0  | 6   | 6   | NR  | NR | NR | NR | 65  | 0  | 6  | 6  |
| Zandberg,2019 <sup>43</sup>    | 112 | 2.0(1.6-9.2)  | 10.3            | 1  | 17  | 18  | 112 | 1  | 17 | 18 | NR  | NR | NR | NR |
| Amaria,2018 <sup>44</sup>      | 12  | NR            | NR              | 3  | 0   | 3   | NR  | NR | NR | NR | NR  | NR | NR | NR |
| Ansell,2015 <sup>45</sup>      | 23  | NR            | NR              | 4  | 16  | 20  | NR  | NR | NR | NR | NR  | NR | NR | NR |
| Ansell,2019 <sup>46</sup>      | 121 | 1.9           | 10.4(2.0-19.0+) | 3  | 7   | 10  | NR  | NR | NR | NR | NR  | NR | NR | NR |
| Antonia,2016 <sup>47</sup>     | 98  | 2             | NR              | 0  | 10  | 10  | NR  | NR | NR | NR | NR  | NR | NR | NR |
| Armand,2018 <sup>48</sup>      | 243 | 2.1           | 16.6            | 40 | 128 | 168 | NR  | NR | NR | NR | NR  | NR | NR | NR |
| Ascierto,2018 <sup>49</sup>    | 210 | 2.1           | NR              | 40 | 50  | 90  | 59  | 21 | NR | NR | 151 | 19 | NR | NR |
| Ben-ami,2017 <sup>50</sup>     | 12  | NR            | NR              | 0  | 0   | 0   | NR  | NR | NR | NR | NR  | NR | NR | NR |
| Borghaei,2015 <sup>51</sup>    | 292 | 2.1(1.2-8.6)  | 17.2(1.8-22.6+) | 4  | 52  | 56  | 123 | NR | NR | 38 | 108 | NR | NR | 10 |
| Brahmer,2012 <sup>52</sup>     | 52  | NR            | NR              | NR | NR  | 9   | NR  | NR | NR | NR | NR  | NR | NR | NR |
| Brahmer,2012 <sup>52</sup>     | 17  | NR            | NR              | NR | NR  | 2   | NR  | NR | NR | NR | NR  | NR | NR | NR |
| Brahmer,2012 <sup>52</sup>     | 49  | NR            | NR              | NR | NR  | 5   | NR  | NR | NR | NR | NR  | NR | NR | NR |
| Brahmer,2012 <sup>52</sup>     | 17  | NR            | NR              | NR | NR  | 1   | NR  | NR | NR | NR | NR  | NR | NR | NR |
| Brahmer,2015 <sup>53</sup>     | 135 | 2.2(1.6-11.8) | 2.9-20.5+       | 1  | 26  | 27  | 63  | NR | NR | 11 | 54  | NR | NR | 9  |
| Carbone,2017 <sup>54</sup>     | 271 | 2.8(1.2-13.2) | 12.1(1.7-19.4+) | NR | NR  | NR  | 211 | 4  | 51 | 55 | NR  | NR | NR | NR |
| Carneiro,2019 <sup>55</sup>    | 10  | 2.0           | NR              | 0  | 1   | 1   | NR  | NR | NR | NR | NR  | NR | NR | NR |
| D'angelo,2018 <sup>56</sup>    | 38  | 1.2(1.2-1.3)  | 7.4(3.2-11.6)   | 0  | 2   | 2   | NR  | NR | NR | NR | NR  | NR | NR | NR |
| El-Khoueiry,2017 <sup>57</sup> | 48  | <3.0          | 17.0            | 3  | 4   | 7   | 11  | 1  | 2  | 3  | 33  | 2  | 2  | 4  |
| El-Khoueiry,2017 <sup>57</sup> | 214 | <3.0          | 9.9(8.3-N)      | 3  | 39  | 42  | 34  | 1  | 8  | 9  | 140 | 2  | 24 | 26 |
| Ferris,2016 <sup>58</sup>      | 240 | 2.1(1.8-7.4)  | 9.7(2.8-32.8+)  | 6  | 26  | 32  | 88  | NR | NR | 15 | 73  | NR | NR | 9  |
| Flippot,2019 <sup>59</sup>     | 73  | NR            | 7.2             | 4  | 7   | 11  | NR  | NR | NR | NR | NR  | NR | NR | NR |
| Forde,2018 <sup>60</sup>       | 20  | NR            | NR              | 3  | 6   | 9   | 7   | 1  | 2  | 3  | 8   | 1  | 1  | 2  |







|                               |     |               |                  |    |     |     |     |    |     |     |     |    |    |    |
|-------------------------------|-----|---------------|------------------|----|-----|-----|-----|----|-----|-----|-----|----|----|----|
| Kluger,2019 <sup>132</sup>    | 23  | NR            | NR               | 4  | 2   | 6   | NR  | NR | NR  | NR  | NR  | NR | NR | NR |
| Leighl,2019 <sup>133</sup>    | 550 | 2.1(2.0-4.1)  | 30.3(1.0+-47.7+) | 6  | 137 | 143 | 385 | NR | NR  | 111 | 90  | NR | NR | 13 |
| Levy,2019 <sup>134</sup>      | 49  | NR            | NR               | 0  | 7   | 7   | 17  | 0  | 4   | 4   | 20  | 0  | 1  | 1  |
| Long,2019 <sup>135</sup>      | 352 | 2.8           | NR               | 15 | 96  | 111 | NR  | NR | NR  | NR  | NR  | NR | NR | NR |
| Matulonis,2019 <sup>136</sup> | 376 | 2.1(1.8-12.3) | 8.2(3.3+-18.6)   | 7  | 23  | 30  | 197 | 7  | 13  | 20  | 141 | 0  | 7  | 7  |
| Mehra,2018 <sup>137</sup>     | 192 | 2.0(2.0-17.0) | 2.0+-30.0+       | 8  | 26  | 34  | 152 | NR | NR  | 32  | 36  | NR | NR | 2  |
| Mok,2019 <sup>138</sup>       | 637 | 2.1(2.0-4.1)  | 20.2(16.6-N)     | 3  | 171 | 174 | 637 | 3  | 171 | 174 | NR  | NR | NR | NR |
| Muro,2016 <sup>139</sup>      | 36  | 2.0(1.8-2.0)  | 10.0(8.0-N)      | 0  | 8   | 8   | 36  | 0  | 8   | 8   | NR  | NR | NR | NR |
| Nanda,2016 <sup>140</sup>     | 27  | 4.5(1.8-8.1)  | 3.8-11.8+        | 1  | 4   | 5   | NR  | NR | NR  | NR  | NR  | NR | NR | NR |
| Nghiem2019 <sup>141</sup>     | 50  | 2.8(1.5-9.7)  | NR               | 12 | 16  | 28  | 41  | NR | NR  | 24  | 6   | NR | NR | 3  |
| Nishio,2018 <sup>142</sup>    | 38  | NR            | 22.8(3.9-29.1+)  | 0  | 8   | 8   | 37  | 0  | 8   | 8   | 1   | 0  | 0  | 0  |
| Ott,2017 <sup>143</sup>       | 24  | 3.6(1.6-4.8)  | 0.1-9.2+         | 0  | 4   | 4   | NR  | NR | NR  | NR  | NR  | NR | NR | NR |
| Ott,2017 <sup>144</sup>       | 24  | 2.0(1.7-3.7)  | 19.4(3.6+-20.0+) | 1  | 7   | 8   | NR  | NR | NR  | NR  | NR  | NR | NR | NR |
| Ott,2017 <sup>145</sup>       | 23  | 2.0(1.9-2.0)  | 16.1-16.2+       | 0  | 3   | 3   | 23  | 0  | 3   | 3   | NR  | NR | NR | NR |
| Ott,2019 <sup>146</sup>       | 23  | NR            | NR               | 1  | 3   | 4   | NR  | NR | NR  | NR  | NR  | NR | NR | NR |
| Ott,2019 <sup>146</sup>       | 25  | NR            | NR               | 0  | 3   | 3   | NR  | NR | NR  | NR  | NR  | NR | NR | NR |
| Ott,2019 <sup>146</sup>       | 23  | NR            | NR               | 0  | 1   | 1   | NR  | NR | NR  | NR  | NR  | NR | NR | NR |
| Ott,2019 <sup>146</sup>       | 25  | NR            | NR               | 0  | 2   | 2   | NR  | NR | NR  | NR  | NR  | NR | NR | NR |
| Ott,2019 <sup>146</sup>       | 24  | NR            | NR               | 0  | 1   | 1   | NR  | NR | NR  | NR  | NR  | NR | NR | NR |
| Ott,2019 <sup>146</sup>       | 16  | NR            | NR               | 0  | 1   | 1   | NR  | NR | NR  | NR  | NR  | NR | NR | NR |
| Ott,2019 <sup>146</sup>       | 24  | NR            | NR               | 0  | 0   | 0   | NR  | NR | NR  | NR  | NR  | NR | NR | NR |
| Ott,2019 <sup>146</sup>       | 22  | NR            | NR               | 0  | 2   | 2   | NR  | NR | NR  | NR  | NR  | NR | NR | NR |
| Ott,2019 <sup>146</sup>       | 18  | NR            | NR               | 0  | 1   | 1   | NR  | NR | NR  | NR  | NR  | NR | NR | NR |
| Plimack,2017 <sup>147</sup>   | 27  | 2.0(2.0-13.0) | 10.0(4.0-22.0+)  | 3  | 4   | 7   | 24  | NR | NR  | 5   | 4   | 0  | 0  | 0  |
| Reck,2019 <sup>148</sup>      | 154 | 2.2(1.4-8.2)  | 1.9+-14.5+       | NR | NR  | 69  | 154 | NR | NR  | 69  | NR  | NR | NR | NR |

|                              |     |              |                 |   |    |    |     |    |    |    |    |    |    |    |
|------------------------------|-----|--------------|-----------------|---|----|----|-----|----|----|----|----|----|----|----|
| Ribrag,2019 <sup>149</sup>   | 30  | NR           | NR              | 0 | 0  | 0  | NR  | NR | NR | NR | NR | NR | NR | NR |
| Rugo,2018 <sup>150</sup>     | 25  | 1.7(1.7-1.9) | 12.0(7.4-15.9)  | 0 | 3  | 3  | NR  | NR | NR | NR | NR | NR | NR | NR |
| Seiwert,2016 <sup>151</sup>  | 45  | 2(1.8-4.2)   | 13.3(3.3-N)     | 1 | 7  | 8  | 45  | 1  | 7  | 8  | NR | NR | NR | NR |
| Shah,2018 <sup>152</sup>     | 121 | 4.1(2.0-6.3) | 1.9-14.4        | 0 | 12 | 12 | 58  | 0  | 8  | 8  | 63 | 0  | 4  | 4  |
| Shimizu,2016 <sup>153</sup>  | 9   | 1.5(1.4-1.6) | NR              | 0 | 2  | 2  | 2   | 0  | 0  | 0  | 3  | 0  | 1  | 1  |
| Shitara,2018 <sup>154</sup>  | 196 | NR           | 18.0            | 7 | 24 | 31 | 196 | 7  | 24 | 31 | NR | NR | NR | NR |
| Si,2019 <sup>155</sup>       | 103 | 2.8(2.6-9.7) | 8.4(1.1+-11.0+) | 1 | 16 | 17 | 53  | NR | NR | 11 | 45 | NR | NR | 6  |
| Tawbi,2017 <sup>156</sup>    | 40  | NR           | 8.3             | 1 | 6  | 7  | 2   | 1  | 1  | 2  | 38 | 0  | 0  | 0  |
| Tawbi,2017 <sup>156</sup>    | 40  | NR           | 10.8            | 0 | 2  | 2  | 0   | 0  | 0  | 0  | 40 | 0  | 0  | 0  |
| Varga,2019 <sup>157</sup>    | 26  | 1.7(1.7-1.8) | 20.5+-30.4+     | 1 | 2  | 3  | 26  | 1  | 2  | 3  | NR | NR | NR | NR |
| Yamazaki,2017 <sup>158</sup> | 37  | 3.1(3.0-6.0) | 4.3-9.3+        | 2 | 7  | 9  | 18  | NR | NR | 3  | 11 | NR | NR | 4  |
| Zhu,2018 <sup>159</sup>      | 104 | 2.1(2.1-4.1) | 3.1-14.6        | 1 | 17 | 18 | 22  | NR | NR | 7  | 30 | NR | NR | 6  |
| Zinzan,2017 <sup>160</sup>   | 17  | NR           | 2.3+-22.4+      | 2 | 5  | 7  | NR  | NR | NR | NR | NR | NR | NR | NR |

CR, Complete response; OR, objective response; PR, partial response; NR, not reported; N, not reached.

**Supplemental table 3. Baseline characteristics of the eligible RCTs included in this study.**

| Study                          | Phase | Cancer type | Drug         | No. of patients | Median age (range), y | Sex (M/F) | Treatment duration, median (range), m | Median follow-up (range), m | No. of PD-L1 positive patients | No. of PD-L1 negative patients | Jadad score |
|--------------------------------|-------|-------------|--------------|-----------------|-----------------------|-----------|---------------------------------------|-----------------------------|--------------------------------|--------------------------------|-------------|
| Eng,2019 <sup>4</sup>          | 3     | CRC         | Atezolizumab | 90              | 56(51-64)             | 59/31     | 1.4                                   | NR                          | 35                             | 42                             | 3           |
|                                |       |             | Regorafenib  | 90              | 59(52-66)             | 51/39     | 1.7                                   | NR                          | 31                             | 40                             |             |
| Fehrenbacher,2016 <sup>5</sup> | 2     | LC          | Atezolizumab | 144             | 62(42-82)             | 93/51     | 3.7(0-19.0)                           | 14.8(0.2-19.6)              | 93                             | 51                             | 3           |
|                                |       |             | Docetaxel    | 143             | 62(36-84)             | 76/67     | 2.1(0-17.0)                           | 15.7(0.1-18.7)              | 102                            | 41                             |             |
| Fehrenbacher,2018 <sup>6</sup> | 3     | LC          | Atezolizumab | 613             | 63(25-84)             | 379/234   | 3.4(0.0-26.0)                         | 26                          | 347                            | 260                            | 4           |
|                                |       |             | Docetaxel    | 612             | 64(34-85)             | 379/233   | 2.1(0.0-23.0)                         | NR                          | 337                            | 271                            |             |
| Mcdermott,2018 <sup>10</sup>   | 2     | RC          | Atezolizumab | 103             | 61(27-81)             | 77/26     | 7.6(0.0-33.1)                         | 20.7                        | 54                             | NR                             | 2           |
|                                |       |             | Sunitinib    | 101             | 61(25-85)             | 79/22     | 6.7(0.1-33.1)                         | NR                          | 60                             | NR                             |             |
| Powles,2017 <sup>40</sup>      | 3     | UC          | Atezolizumab | 467             | 67(33-88)             | 357/110   | 2.8(0-24.0)                           | 17.3(0-24.5)                | 116                            | 351                            | 4           |
|                                |       |             | ICC          | 464             | 67(31-84)             | 361/103   | 2.1(0-23.0)                           | NR                          | 118                            | 346                            |             |
| Pujol,2019 <sup>14</sup>       | 2     | LC          | Atezolizumab | 49              | 66(51-86)             | 30/19     | NR                                    | 13.7                        | NR                             | NR                             | 2           |
|                                |       |             | ICC          | 24              | 64(52-81)             | 13/11     | NR                                    | NR                          | NR                             | NR                             |             |
| Bang,2018 <sup>19</sup>        | 3     | GC/GEJC     | Avelumab     | 185             | 59 (29–86)            | 140/45    | 2.0(0.5-16.5)                         | 10.6(0.1-17.8)              | NR                             | NR                             | 3           |
|                                |       |             | ICC          | 186             | 61(18-82)             | 127/59    | 2.3(1.0-14.5)                         | 10.6(0.0-17.6)              | NR                             | NR                             |             |
| Barlesi,2018 <sup>20</sup>     | 3     | LC          | Avelumab     | 396             | 64 (58–69)            | 269/127   | 3.4                                   | 18.9                        | 264                            | 132                            | 4           |
|                                |       |             | Docetaxel    | 396             | 63(57-69)             | 273/123   | 2.8                                   | 17.8                        | 265                            | 131                            |             |
| Antonia,2018 <sup>35</sup>     | 3     | LC          | Durvalumab   | 476             | 64(31-84)             | 334/142   | 9.4(0.2-12.6)                         | 25.2(0.2-43.1)              | NR                             | NR                             | 4           |
|                                |       |             | Placebo      | 237             | 64(23-90)             | 166/71    | 7.0(0.3-13.3)                         | NR                          | NR                             | NR                             |             |
|                                |       |             | Nivolumab    | 210             | 64(18-86)             | 121/89    | NR                                    | >38.4                       | 59                             | 151                            |             |

|                             |   |         |               |     |           |         |                |                 |     |     |   |
|-----------------------------|---|---------|---------------|-----|-----------|---------|----------------|-----------------|-----|-----|---|
| Ascierto,2018 <sup>49</sup> | 3 | M       | Dacarbazine   | 208 | 66(25-87) | 125/83  | NR             | >38.5           | 61  | 147 | 3 |
| Borghaei,2015 <sup>51</sup> | 3 | LC      | Nivolumab     | 292 | 61(37-84) | 151/141 | NR             | >17.2           | 123 | 108 | 3 |
|                             |   |         | Docetaxel     | 290 | 64(21-85) | 168/122 | NR             | NR              | 123 | 101 |   |
| Brahmer,2015 <sup>53</sup>  | 3 | LC      | Nivolumab     | 135 | 62(39-85) | 111/24  | 6.0(0.8-36.0)  | >11.0           | 63  | 54  | 3 |
|                             |   |         | Docetaxel     | 137 | 64(42-84) | 97/40   | 2.3(0.8-21.8)  | NR              | 56  | 52  |   |
| Carbone,2017 <sup>54</sup>  | 3 | LC      | Nivolumab     | 271 | 63(32-89) | 184/87  | 3.7(0-26.9+)   | 13.7            | 211 | NR  | 4 |
|                             |   |         | ICC           | 270 | 65(29-87) | 148/122 | 3.4(0.0-20.9+) | 13.5            | 212 | NR  |   |
| Ferris,2016 <sup>58</sup>   | 3 | HNC     | Nivolumab     | 240 | 59(29-83) | 197/43  | 1.9            | 5.1(0.0-16.8)   | 88  | 73  | 3 |
|                             |   |         | ICC           | 121 | 61(28-78) | 103/18  | 1.9            | NR              | 61  | 38  |   |
| Kang,2017 <sup>68</sup>     | 3 | GC/GEJC | Nivolumab     | 330 | 62(54-69) | 229/101 | 1.9            | 8.9             | NR  | NR  | 3 |
|                             |   |         | Placebo       | 163 | 61(53-68) | 119/44  | 1.1            | 8.6             | NR  | NR  |   |
| Larkin,2018 <sup>71</sup>   | 3 | M       | Nivolumab     | 272 | 59(23-88) | 176/96  | 4.7            | NR              | 179 | 69  | 4 |
|                             |   |         | ICC           | 133 | 62(29-85) | 85/48   | 2.0            | NR              | 74  | 25  |   |
| Motzer,2015 <sup>80</sup>   | 3 | RC      | Nivolumab     | 410 | 62(23-88) | 315/95  | 5.5(0.1-29.6)  | >14.0           | 94  | 276 | 4 |
|                             |   |         | Everolimus    | 411 | 62(18-86) | 304/107 | 3.7(0.2-25.7)  | NR              | 87  | 299 |   |
| Wu,2019 <sup>100</sup>      | 3 | LC      | Nivolumab     | 338 | 60(27-78) | 263/75  | 2.5            | 10.4(0.2-21.1)  | NR  | NR  | 3 |
|                             |   |         | Docetaxel     | 166 | 60(38-78) | 134/32  | 1.3            | 8.8(0-18.7)     | NR  | NR  |   |
| Cohen,2018 <sup>116</sup>   | 3 | HNC     | Pembrolizumab | 247 | 60(55-66) | 207/40  | NR             | 8.4             | 196 | 50  | 4 |
|                             |   |         | ICC           | 248 | 60(54-66) | 205/43  | NR             | 7.1             | 191 | 54  |   |
| Fradet,2019 <sup>120</sup>  | 3 | UC      | Pembrolizumab | 270 | 67(29-88) | 200/70  | 3.5(0-20.0)    | 27.7            | 74  | NR  | 4 |
|                             |   |         | ICC           | 272 | 65(26-84) | 202/70  | NR             | NR              | 90  | NR  |   |
| Hamid,2017 <sup>126</sup>   | 2 | M       | Pembrolizumab | 361 | 61(15-89) | 213/148 | 4.3(0-32.9)    | 28.1(24.1-35.5) | NR  | NR  | 3 |
|                             |   |         | ICC           | 179 | 63(27-87) | 114/65  | 2.1(0-16.4)    | NR              | NR  | NR  |   |
|                             |   |         | Pembrolizumab | 690 | 63(56-69) | 425/265 | 3.5            | 31(23-41)       | 690 | NR  |   |



|                             |     |         |               |     |           |         |               |                 |     |    |   |
|-----------------------------|-----|---------|---------------|-----|-----------|---------|---------------|-----------------|-----|----|---|
| Herbst,2019 <sup>129</sup>  | 2/3 | LC      | Docetaxel     | 343 | 62(56-69) | 209/134 | 2.0           | NR              | 343 | NR | 4 |
| Mok,2019 <sup>138</sup>     | 3   | LC      | Pembrolizumab | 637 | 63(57-69) | 450/187 | NR            | 12.8            | 637 | NR | 4 |
|                             |     |         | ICC           | 637 | 63(57-69) | 452/185 | NR            | NR              | 637 | NR |   |
| Reck,2019 <sup>148</sup>    | 3   | LC      | Pembrolizumab | 154 | 65(33-90) | 92/62   | 7.9(0.0-28.8) | 25.2(20.4-33.7) | 154 | NR | 3 |
|                             |     |         | ICC           | 151 | 66(38-85) | 95/56   | 3.5(0.0-30.5) | NR              | 151 | NR |   |
| Shitara,2018 <sup>154</sup> | 3   | GC/GEJC | Pembrolizumab | 196 | 64(57-71) | 146/50  | 4.4           | 8.5             | 196 | NR | 3 |
|                             |     |         | Paclitaxel    | 199 | 61(54-68) | 140/59  | 3.5           | NR              | 199 | NR |   |

CRC, Colorectal cancer; GC/GEJC, gastric or gastro-esophageal junction cancer; HNC, Head and neck cancer; ICC, Investigators' choice of chemotherapy; LC, Lung cancer; M, Melanoma; NR, Not reported; RC, Renal cancer; RCT, randomized controlled trial; UC, Urothelial cancer.

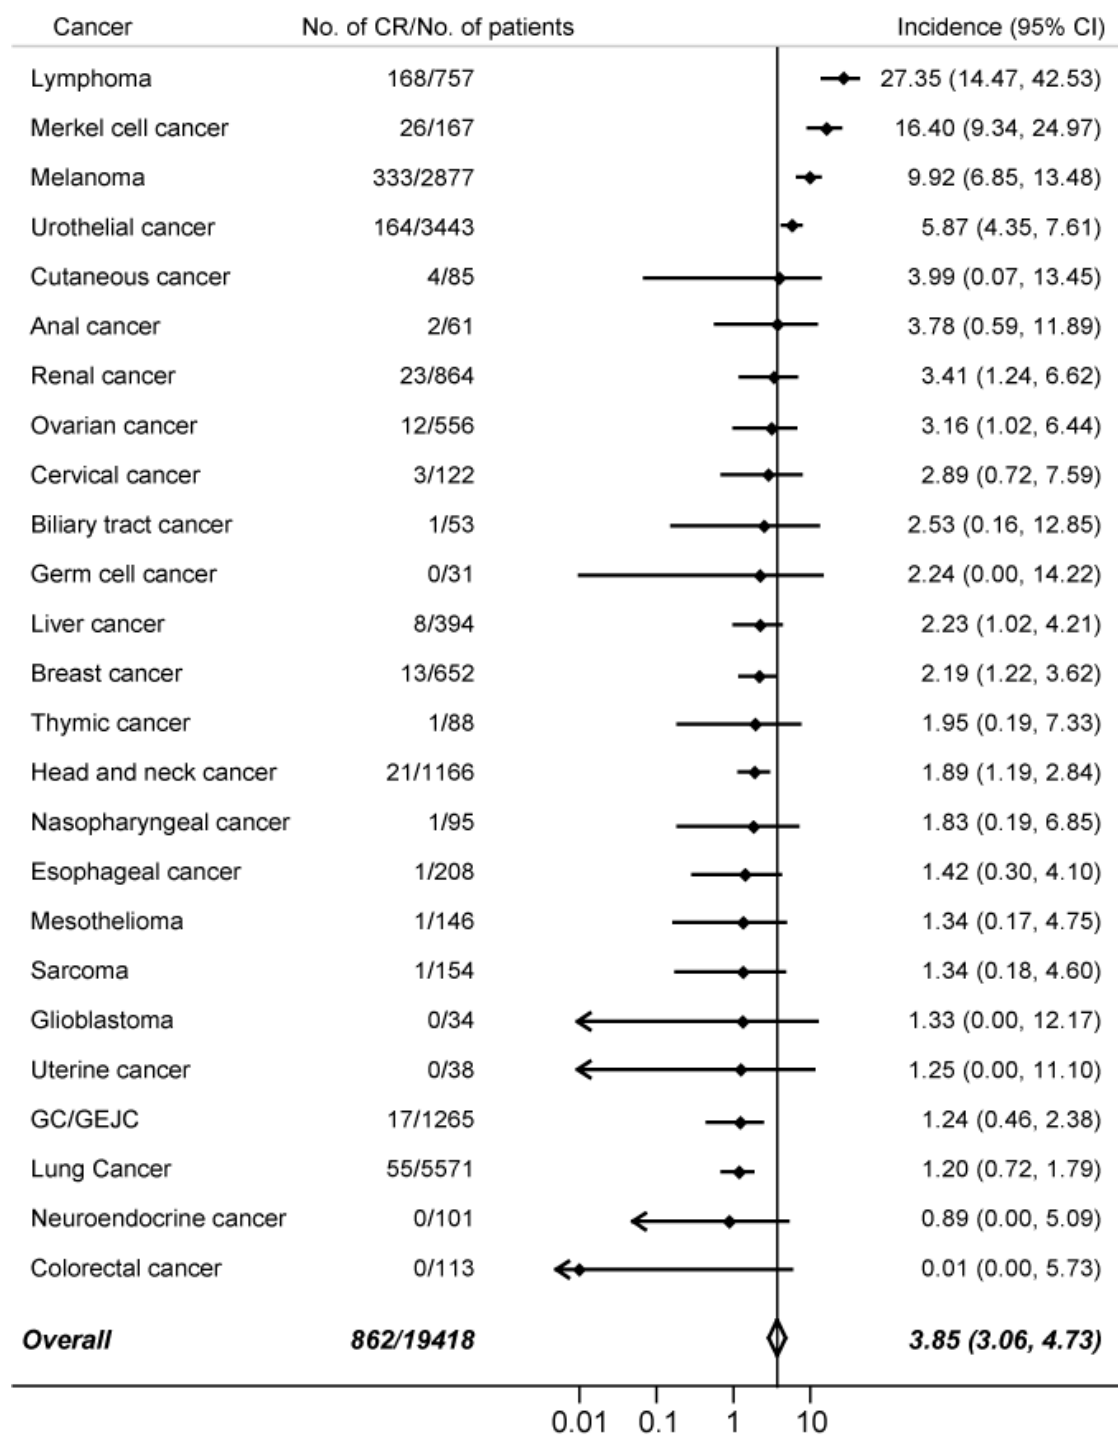

**Supplemental figure 1.**

The incidences of complete response (CR) in 25 different types of tumors. Vertical line indicates the overall mean incidence of CR to PD-1 and PD-L1 blockade immunotherapy.

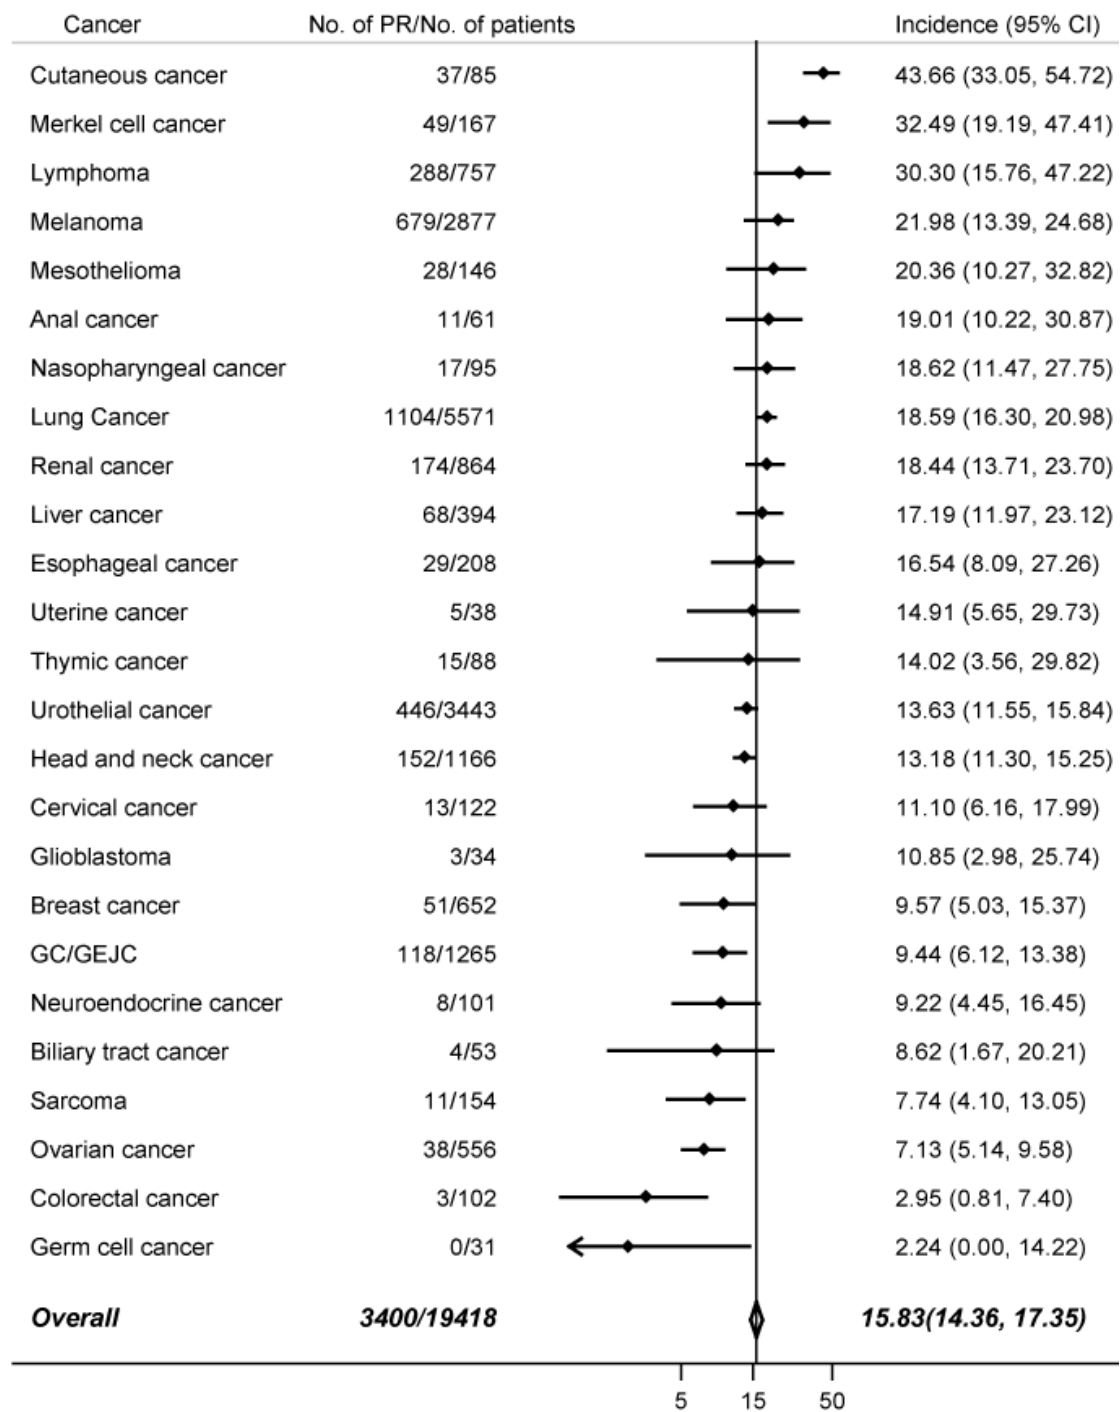

### Supplemental figure 2.

The incidences of partial response (PR) in 25 different types of tumors. Vertical line indicates the overall mean incidence of PR to PD-1 and PD-L1 blockade immunotherapy.

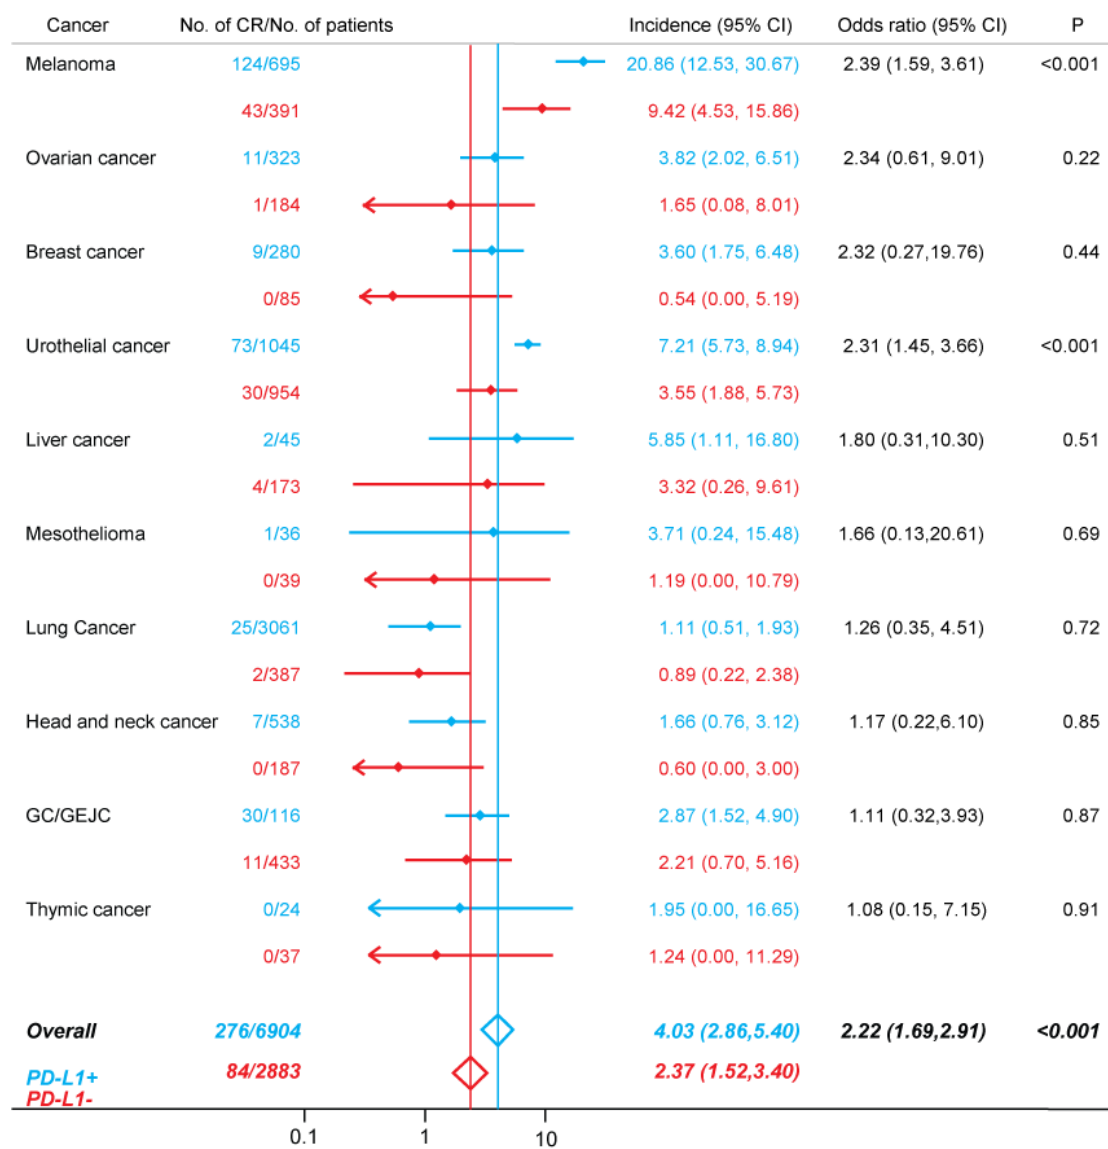

### Supplemental figure 3.

Comparison of the incidences of complete response (CR) between PD-L1 positive (blue) and PD-L1 negative (red) patient with cancer. Vertical lines indicate the overall mean incidence of CR to PD-1 and PD-L1 blockade immunotherapy.

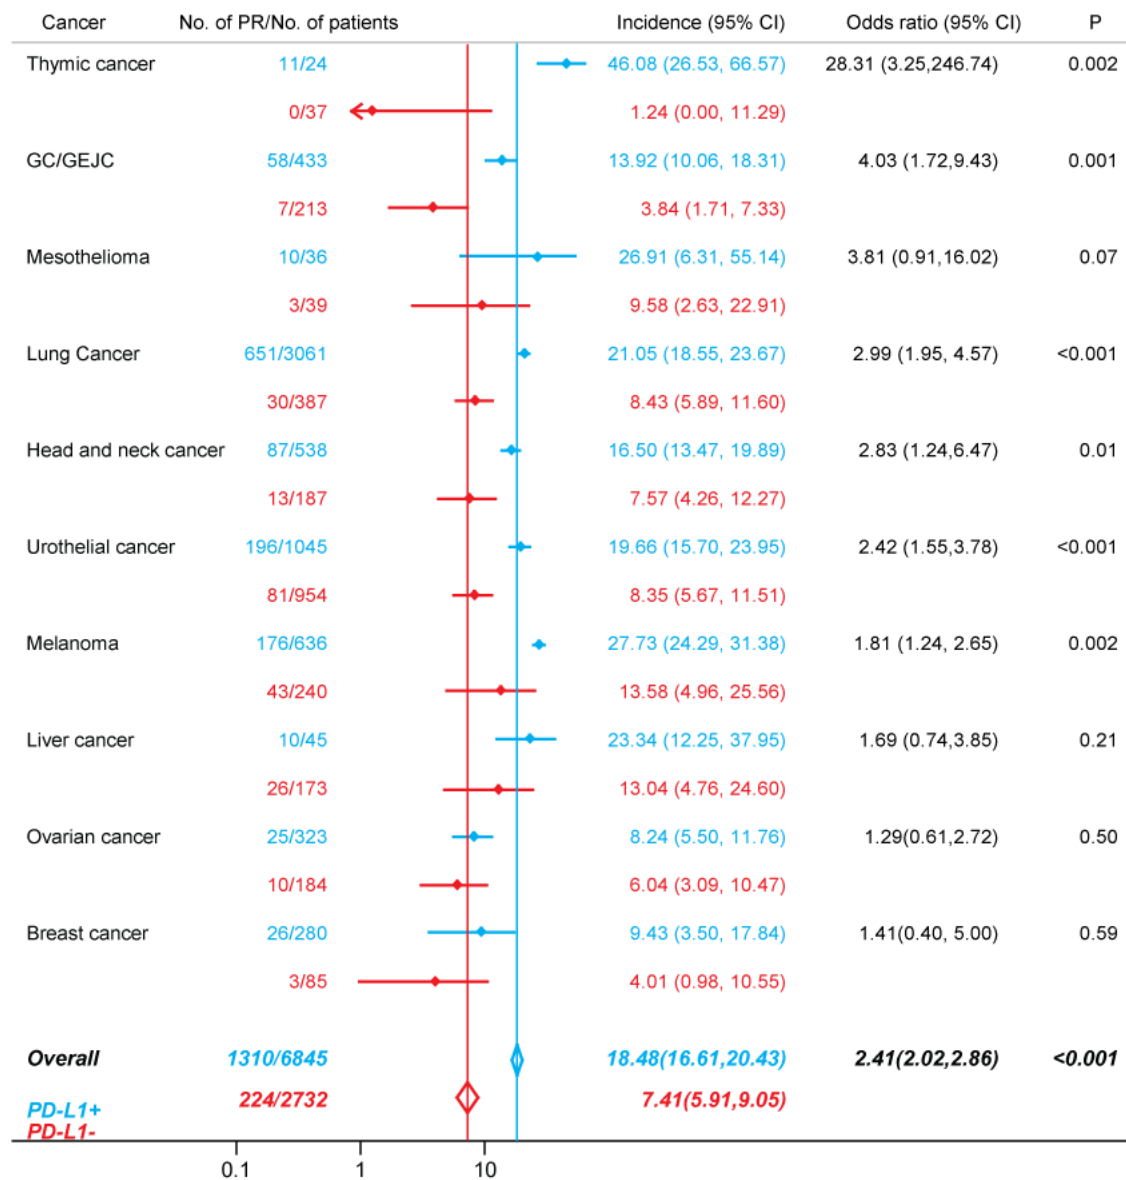

#### Supplemental figure 4.

Comparison of the incidences of partial response (PR) between PD-L1 positive (blue) and PD-L1 negative (red) patient with cancer. Vertical lines indicate the overall mean incidence of PR to PD-1 and PD-L1 blockade immunotherapy.

## References:

1. Balar AV, Galsky MD, Rosenberg JE, et al. Atezolizumab as first-line treatment in cisplatin-ineligible patients with locally advanced and metastatic urothelial carcinoma: a single-arm, multicentre, phase 2 trial. *Lancet* 2017;**389**(10064):67-76.
2. Colevas AD, Bahleda R, Braiteh F, et al. Safety and clinical activity of atezolizumab in head and neck cancer: results from a phase I trial. *Annals of oncology : official journal of the European Society for Medical Oncology / ESMO* 2018;**29**(11):2247-53.
3. Emens LA, Cruz C, Eder JP, et al. Long-term Clinical Outcomes and Biomarker Analyses of Atezolizumab Therapy for Patients With Metastatic Triple-Negative Breast Cancer: A Phase 1 Study. *JAMA oncology* 2019;**5**(1):74-82.
4. Eng C, Kim TW, Bendell J, et al. Atezolizumab with or without cobimetinib versus regorafenib in previously treated metastatic colorectal cancer (IMblaze370): a multicentre, open-label, phase 3, randomised, controlled trial. *The Lancet Oncology* 2019;**20**(6):849-61.
5. Fehrenbacher L, Spira A, Ballinger M, et al. Atezolizumab versus docetaxel for patients with previously treated non-small-cell lung cancer (POPLAR): a multicentre, open-label, phase 2 randomised controlled trial. *Lancet* 2016;**387**(10030):1837-46.
6. Fehrenbacher L, von Pawel J, Park K, et al. Updated Efficacy Analysis Including Secondary Population Results for OAK: A Randomized Phase III Study of Atezolizumab versus Docetaxel in Patients with Previously Treated Advanced Non-Small Cell Lung Cancer. *Journal of thoracic oncology : official publication of the International Association for the Study of Lung Cancer* 2018;**13**(8):1156-70.
7. Horn L, Gettinger SN, Gordon MS, et al. Safety and clinical activity of atezolizumab

monotherapy in metastatic non-small-cell lung cancer: final results from a phase I study.

European journal of cancer 2018;**101**:201-09.

8. Liu JF, Gordon M, Veneris J, et al. Safety, clinical activity and biomarker assessments of atezolizumab from a Phase I study in advanced/recurrent ovarian and uterine cancers. Gynecol Oncol 2019.
9. McDermott DF, Sosman JA, Sznol M, et al. Atezolizumab, an Anti-Programmed Death-Ligand 1 Antibody, in Metastatic Renal Cell Carcinoma: Long-Term Safety, Clinical Activity, and Immune Correlates From a Phase Ia Study. Journal of clinical oncology : official journal of the American Society of Clinical Oncology 2016;**34**(8):833-42.
10. McDermott DF, Huseni MA, Atkins MB, et al. Clinical activity and molecular correlates of response to atezolizumab alone or in combination with bevacizumab versus sunitinib in renal cell carcinoma. Nature medicine 2018;**24**(6):749-57.
11. Peters S, Gettinger S, Johnson ML, et al. Phase II Trial of Atezolizumab As First-Line or Subsequent Therapy for Patients With Programmed Death-Ligand 1-Selected Advanced Non-Small-Cell Lung Cancer (BIRCH). Journal of clinical oncology : official journal of the American Society of Clinical Oncology 2017;**35**(24):2781-89.
12. Petrylak DP, Powles T, Bellmunt J, et al. Atezolizumab (MPDL3280A) Monotherapy for Patients With Metastatic Urothelial Cancer: Long-term Outcomes From a Phase 1 Study. JAMA oncology 2018;**4**(4):537-44.
13. Powles T, Duran I, van der Heijden MS, et al. Atezolizumab versus chemotherapy in patients with platinum-treated locally advanced or metastatic urothelial carcinoma (IMvigor211): a multicentre, open-label, phase 3 randomised controlled trial. Lancet 2018;**391**(10122):748-

57.

14. Pujol JL, Greillier L, Audigier-Valette C, et al. A Randomized Non-Comparative Phase II Study of Anti-Programmed Cell Death-Ligand 1 Atezolizumab or Chemotherapy as Second-Line Therapy in Patients With Small Cell Lung Cancer: Results From the IFCT-1603 Trial. *Journal of thoracic oncology : official publication of the International Association for the Study of Lung Cancer* 2019;**14**(5):903-13.
15. Rosenberg JE, Hoffman-Censits J, Powles T, et al. Atezolizumab in patients with locally advanced and metastatic urothelial carcinoma who have progressed following treatment with platinum-based chemotherapy: a single-arm, multicentre, phase 2 trial. *Lancet* 2016;**387**(10031):1909-20.
16. Spigel DR, Chaft JE, Gettinger S, et al. FIR: Efficacy, Safety, and Biomarker Analysis of a Phase II Open-Label Study of Atezolizumab in PD-L1-Selected Patients With NSCLC. *Journal of thoracic oncology : official publication of the International Association for the Study of Lung Cancer* 2018;**13**(11):1733-42.
17. Sternberg CN, Loriot Y, James N, et al. Primary Results from SAUL, a Multinational Single-arm Safety Study of Atezolizumab Therapy for Locally Advanced or Metastatic Urothelial or Nonurothelial Carcinoma of the Urinary Tract. *Eur Urol* 2019;**76**(1):73-81.
18. Apolo AB, Infante JR, Balmanoukian A, et al. Avelumab, an Anti-Programmed Death-Ligand 1 Antibody, In Patients With Refractory Metastatic Urothelial Carcinoma: Results From a Multicenter, Phase Ib Study. *Journal of clinical oncology : official journal of the American Society of Clinical Oncology* 2017;**35**(19):2117-24.
19. Bang YJ, Ruiz EY, Van Cutsem E, et al. Phase III, randomised trial of avelumab versus



physician's choice of chemotherapy as third-line treatment of patients with advanced gastric or gastro-oesophageal junction cancer: primary analysis of JAVELIN Gastric 300. *Annals of oncology : official journal of the European Society for Medical Oncology / ESMO* 2018;**29**(10):2052-60.

20. Barlesi F, Vansteenkiste J, Spigel D, et al. Avelumab versus docetaxel in patients with platinum-treated advanced non-small-cell lung cancer (JAVELIN Lung 200): an open-label, randomised, phase 3 study. *The Lancet Oncology* 2018;**19**(11):1468-79.

21. Chung HC, Arkenau HT, Lee J, et al. Avelumab (anti-PD-L1) as first-line switch-maintenance or second-line therapy in patients with advanced gastric or gastroesophageal junction cancer: phase 1b results from the JAVELIN Solid Tumor trial. *J Immunother Cancer* 2019;**7**(1):30.

22. D'Angelo SP, Russell J, Lebbe C, et al. Efficacy and Safety of First-line Avelumab Treatment in Patients With Stage IV Metastatic Merkel Cell Carcinoma: A Preplanned Interim Analysis of a Clinical Trial. *JAMA oncology* 2018;**4**(9):e180077.

23. Dirix LY, Takacs I, Jerusalem G, et al. Avelumab, an anti-PD-L1 antibody, in patients with locally advanced or metastatic breast cancer: a phase 1b JAVELIN Solid Tumor study. *Breast Cancer Res Treat* 2018;**167**(3):671-86.

24. Disis ML, Taylor MH, Kelly K, et al. Efficacy and Safety of Avelumab for Patients With Recurrent or Refractory Ovarian Cancer: Phase 1b Results From the JAVELIN Solid Tumor Trial. *JAMA oncology* 2019.

25. Doi T, Iwasa S, Muro K, et al. Phase 1 trial of avelumab (anti-PD-L1) in Japanese patients with advanced solid tumors, including dose expansion in patients with gastric or

- gastroesophageal junction cancer: the JAVELIN Solid Tumor JPN trial. *Gastric Cancer* 2018.
26. Gulley JL, Rajan A, Spigel DR, et al. Avelumab for patients with previously treated metastatic or recurrent non-small-cell lung cancer (JAVELIN Solid Tumor): dose-expansion cohort of a multicentre, open-label, phase 1b trial. *The Lancet Oncology* 2017;**18**(5):599-610.
27. Hassan R, Thomas A, Nemunaitis JJ, et al. Efficacy and Safety of Avelumab Treatment in Patients With Advanced Unresectable Mesothelioma: Phase 1b Results From the JAVELIN Solid Tumor Trial. *JAMA oncology* 2019.
28. Heery CR, O'Sullivan-Coyne G, Madan RA, et al. Avelumab for metastatic or locally advanced previously treated solid tumours (JAVELIN Solid Tumor): a phase 1a, multicohort, dose-escalation trial. *The Lancet Oncology* 2017;**18**(5):587-98.
29. Kaufman HL, Russell JS, Hamid O, et al. Updated efficacy of avelumab in patients with previously treated metastatic Merkel cell carcinoma after  $\geq 1$  year of follow-up: JAVELIN Merkel 200, a phase 2 clinical trial. *J Immunother Cancer* 2018;**6**(1):7.
30. Keilholz U, Mehnert JM, Bauer S, et al. Avelumab in patients with previously treated metastatic melanoma: phase 1b results from the JAVELIN Solid Tumor trial. *J Immunother Cancer* 2019;**7**(1):12.
31. Mego M, Svetlovska D, Chovanec M, et al. Phase II study of avelumab in multiple relapsed/refractory germ cell cancer. *Investigational new drugs* 2019.
32. Patel MR, Ellerton J, Infante JR, et al. Avelumab in metastatic urothelial carcinoma after platinum failure (JAVELIN Solid Tumor): pooled results from two expansion cohorts of an open-label, phase 1 trial. *The Lancet Oncology* 2018;**19**(1):51-64.

33. Le Tourneau C, Hoimes C, Zarwan C, et al. Avelumab in patients with previously treated metastatic adrenocortical carcinoma: phase 1b results from the JAVELIN solid tumor trial. *J Immunother Cancer* 2018;**6**(1):111.
34. Migden MR, Rischin D, Schmultz CD, et al. PD-1 Blockade with Cemiplimab in Advanced Cutaneous Squamous-Cell Carcinoma. *The New England journal of medicine* 2018;**379**(4):341-51.
35. Antonia SJ, Villegas A, Daniel D, et al. Overall Survival with Durvalumab after Chemoradiotherapy in Stage III NSCLC. *The New England journal of medicine* 2018;**379**(24):2342-50.
36. Antonia SJ, Balmanoukian A, Brahmer J, et al. Clinical Activity, Tolerability, and Long-term Follow-up of Durvalumab in Patients With Advanced NSCLC. *Journal of thoracic oncology : official publication of the International Association for the Study of Lung Cancer* 2019.
37. Garassino MC, Cho BC, Kim JH, et al. Durvalumab as third-line or later treatment for advanced non-small-cell lung cancer (ATLANTIC): an open-label, single-arm, phase 2 study. *The Lancet Oncology* 2018;**19**(4):521-36.
38. Massard C, Gordon MS, Sharma S, et al. Safety and Efficacy of Durvalumab (MEDI4736), an Anti-Programmed Cell Death Ligand-1 Immune Checkpoint Inhibitor, in Patients With Advanced Urothelial Bladder Cancer. *Journal of clinical oncology : official journal of the American Society of Clinical Oncology* 2016;**34**(26):3119-25.
39. Necchi A, Giannatempo P, Raggi D, et al. An Open-label Randomized Phase 2 study of Durvalumab Alone or in Combination with Tremelimumab in Patients with Advanced

- Germ Cell Tumors (APACHE): Results from the First Planned Interim Analysis. *Eur Urol* 2019;**75**(1):201-03.
40. Powles T, O'Donnell PH, Massard C, et al. Efficacy and Safety of Durvalumab in Locally Advanced or Metastatic Urothelial Carcinoma: Updated Results From a Phase 1/2 Open-label Study. *JAMA oncology* 2017;**3**(9):e172411.
41. Segal NH, Ou SI, Balmanoukian A, et al. Safety and efficacy of durvalumab in patients with head and neck squamous cell carcinoma: results from a phase I/II expansion cohort. *European journal of cancer* 2019;**109**:154-61.
42. Siu LL, Even C, Mesia R, et al. Safety and Efficacy of Durvalumab With or Without Tremelimumab in Patients With PD-L1-Low/Negative Recurrent or Metastatic HNSCC: The Phase 2 CONDOR Randomized Clinical Trial. *JAMA oncology* 2018.
43. Zandberg DP, Algazi AP, Jimeno A, et al. Durvalumab for recurrent or metastatic head and neck squamous cell carcinoma: Results from a single-arm, phase II study in patients with  $\geq 25\%$  tumour cell PD-L1 expression who have progressed on platinum-based chemotherapy. *European journal of cancer* 2019;**107**:142-52.
44. Amaria RN, Reddy SM, Tawbi HA, et al. Neoadjuvant immune checkpoint blockade in high-risk resectable melanoma. 2018;**24**(11):1649-54.
45. Ansell SM, Lesokhin AM, Borrello I, et al. PD-1 blockade with nivolumab in relapsed or refractory Hodgkin's lymphoma. *The New England journal of medicine* 2015;**372**(4):311-9.
46. Ansell SM, Minnema MC, Johnson P, et al. Nivolumab for Relapsed/Refractory Diffuse Large B-Cell Lymphoma in Patients Ineligible for or Having Failed Autologous Transplantation:

- A Single-Arm, Phase II Study. *Journal of clinical oncology : official journal of the American Society of Clinical Oncology* 2019;**37**(6):481-89.
47. Antonia SJ, Lopez-Martin JA, Bendell J, et al. Nivolumab alone and nivolumab plus ipilimumab in recurrent small-cell lung cancer (CheckMate 032): a multicentre, open-label, phase 1/2 trial. *The Lancet Oncology* 2016;**17**(7):883-95.
48. Armand P, Engert A, Younes A, et al. Nivolumab for Relapsed/Refractory Classic Hodgkin Lymphoma After Failure of Autologous Hematopoietic Cell Transplantation: Extended Follow-Up of the Multicohort Single-Arm Phase II CheckMate 205 Trial. *Journal of clinical oncology : official journal of the American Society of Clinical Oncology* 2018;**36**(14):1428-39.
49. Ascierto PA, Long GV, Robert C, et al. Survival Outcomes in Patients With Previously Untreated BRAF Wild-Type Advanced Melanoma Treated With Nivolumab Therapy: Three-Year Follow-up of a Randomized Phase 3 Trial. *JAMA oncology* 2018.
50. Ben-Ami E, Barysaukas CM, Solomon S, et al. Immunotherapy with single agent nivolumab for advanced leiomyosarcoma of the uterus: Results of a phase 2 study. *Cancer* 2017;**123**(17):3285-90.
51. Borghaei H, Paz-Ares L, Horn L, et al. Nivolumab versus Docetaxel in Advanced Nonsquamous Non-Small-Cell Lung Cancer. *The New England journal of medicine* 2015;**373**(17):1627-39.
52. Brahmer JR, Tykodi SS, Chow LQ, et al. Safety and activity of anti-PD-L1 antibody in patients with advanced cancer. *The New England journal of medicine* 2012;**366**(26):2455-65.
53. Brahmer J, Reckamp KL, Baas P, et al. Nivolumab versus Docetaxel in Advanced Squamous-

- Cell Non-Small-Cell Lung Cancer. The New England journal of medicine 2015;**373**(2):123-35.
54. Carbone DP, Reck M, Paz-Ares L, et al. First-Line Nivolumab in Stage IV or Recurrent Non-Small-Cell Lung Cancer. The New England journal of medicine 2017;**376**(25):2415-26.
55. Carneiro BA, Konda B, Costa RB, et al. Nivolumab in metastatic adrenocortical carcinoma: results of a phase II trial. The Journal of clinical endocrinology and metabolism 2019.
56. D'Angelo SP, Mahoney MR, Van Tine BA, et al. Nivolumab with or without ipilimumab treatment for metastatic sarcoma (Alliance A091401): two open-label, non-comparative, randomised, phase 2 trials. The Lancet Oncology 2018;**19**(3):416-26.
57. El-Khoueiry AB, Sangro B, Yau T, et al. Nivolumab in patients with advanced hepatocellular carcinoma (CheckMate 040): an open-label, non-comparative, phase 1/2 dose escalation and expansion trial. Lancet 2017;**389**(10088):2492-502.
58. Ferris RL, Blumenschein G, Jr., Fayette J, et al. Nivolumab for Recurrent Squamous-Cell Carcinoma of the Head and Neck. The New England journal of medicine 2016;**375**(19):1856-67.
59. Flippot R, Dalban C, Laguerre B, et al. Safety and Efficacy of Nivolumab in Brain Metastases From Renal Cell Carcinoma: Results of the GETUG-AFU 26 NIVOREN Multicenter Phase II Study. Journal of clinical oncology : official journal of the American Society of Clinical Oncology 2019;Jco1802218.
60. Forde PM, Chaft JE, Smith KN, et al. Neoadjuvant PD-1 Blockade in Resectable Lung Cancer. 2018;**378**(21):1976-86.
61. Fujimoto D, Yomota M, Sekine A, et al. Nivolumab for advanced non-small cell lung cancer

patients with mild idiopathic interstitial pneumonia: A multicenter, open-label single-arm phase II trial. *Lung cancer* 2019.

62. Gettinger SN, Horn L, Gandhi L, et al. Overall Survival and Long-Term Safety of Nivolumab (Anti-Programmed Death 1 Antibody, BMS-936558, ONO-4538) in Patients With Previously Treated Advanced Non-Small-Cell Lung Cancer. *Journal of clinical oncology : official journal of the American Society of Clinical Oncology* 2015;**33**(18):2004-12.
63. Gettinger S, Rizvi NA, Chow LQ, et al. Nivolumab Monotherapy for First-Line Treatment of Advanced Non-Small-Cell Lung Cancer. *Journal of clinical oncology : official journal of the American Society of Clinical Oncology* 2016;**34**(25):2980-7.
64. Hamanishi J, Mandai M, Ikeda T, et al. Safety and Antitumor Activity of Anti-PD-1 Antibody, Nivolumab, in Patients With Platinum-Resistant Ovarian Cancer. *Journal of clinical oncology : official journal of the American Society of Clinical Oncology* 2015;**33**(34):4015-22.
65. Hida T, Nishio M, Nogami N, et al. Efficacy and safety of nivolumab in Japanese patients with advanced or recurrent squamous non-small cell lung cancer. *Cancer science* 2017;**108**(5):1000-06.
66. Hodi FS, Chiarion-Sileni V, Gonzalez R, et al. Nivolumab plus ipilimumab or nivolumab alone versus ipilimumab alone in advanced melanoma (CheckMate 067): 4-year outcomes of a multicentre, randomised, phase 3 trial. *The Lancet Oncology* 2018;**19**(11):1480-92.
67. Janjigian YY, Bendell J, Calvo E, et al. CheckMate-032 Study: Efficacy and Safety of Nivolumab and Nivolumab Plus Ipilimumab in Patients With Metastatic Esophagogastric Cancer. *Journal of clinical oncology : official journal of the American Society of Clinical*

Oncology 2018;**36**(28):2836-44.

68. Kang YK, Boku N, Satoh T, et al. Nivolumab in patients with advanced gastric or gastro-oesophageal junction cancer refractory to, or intolerant of, at least two previous chemotherapy regimens (ONO-4538-12, ATTRACTION-2): a randomised, double-blind, placebo-controlled, phase 3 trial. *Lancet* 2017;**390**(10111):2461-71.
69. Katsuya Y, Horinouchi H, Seto T, et al. Single-arm, multicentre, phase II trial of nivolumab for unresectable or recurrent thymic carcinoma: PRIMER study. *European journal of cancer* 2019;**113**:78-86.
70. Kudo T, Hamamoto Y, Kato K, et al. Nivolumab treatment for oesophageal squamous-cell carcinoma: an open-label, multicentre, phase 2 trial. *The Lancet Oncology* 2017;**18**(5):631-39.
71. Larkin J, Minor D, D'Angelo S, et al. Overall Survival in Patients With Advanced Melanoma Who Received Nivolumab Versus Investigator's Choice Chemotherapy in CheckMate 037: A Randomized, Controlled, Open-Label Phase III Trial. *Journal of clinical oncology : official journal of the American Society of Clinical Oncology* 2018;**36**(4):383-90.
72. Lee JS, Lee KH, Cho EK, et al. Nivolumab in advanced non-small-cell lung cancer patients who failed prior platinum-based chemotherapy. *Lung cancer* 2018;**122**:234-42.
73. Lesokhin AM, Ansell SM, Armand P, et al. Nivolumab in Patients With Relapsed or Refractory Hematologic Malignancy: Preliminary Results of a Phase Ib Study. *Journal of clinical oncology : official journal of the American Society of Clinical Oncology* 2016;**34**(23):2698-704.
74. Long GV, Atkinson V, Lo S, et al. Combination nivolumab and ipilimumab or nivolumab alone



- in melanoma brain metastases: a multicentre randomised phase 2 study. *The Lancet Oncology* 2018;**19**(5):672-81.
75. Ma BBY, Lim WT, Goh BC, et al. Antitumor Activity of Nivolumab in Recurrent and Metastatic Nasopharyngeal Carcinoma: An International, Multicenter Study of the Mayo Clinic Phase 2 Consortium (NCI-9742). *Journal of clinical oncology : official journal of the American Society of Clinical Oncology* 2018;**36**(14):1412-18.
76. Ma Y, Fang W, Zhang Y, et al. A Phase I/II Open-Label Study of Nivolumab in Previously Treated Advanced or Recurrent Nasopharyngeal Carcinoma and Other Solid Tumors. *Oncologist* 2019.
77. Maruyama D, Hatake K, Kinoshita T, et al. Multicenter phase II study of nivolumab in Japanese patients with relapsed or refractory classical Hodgkin lymphoma. *Cancer science* 2017;**108**(5):1007-12.
78. McDermott DF, Drake CG, Sznol M, et al. Survival, Durable Response, and Long-Term Safety in Patients With Previously Treated Advanced Renal Cell Carcinoma Receiving Nivolumab. *Journal of clinical oncology : official journal of the American Society of Clinical Oncology* 2015;**33**(18):2013-20.
79. Morris VK, Salem ME, Nimeiri H, et al. Nivolumab for previously treated unresectable metastatic anal cancer (NCI9673): a multicentre, single-arm, phase 2 study. *The Lancet Oncology* 2017;**18**(4):446-53.
80. Motzer RJ, Escudier B, McDermott DF, et al. Nivolumab versus Everolimus in Advanced Renal-Cell Carcinoma. *The New England journal of medicine* 2015;**373**(19):1803-13.
81. Motzer RJ, Rini BI, McDermott DF, et al. Nivolumab for Metastatic Renal Cell Carcinoma:

- Results of a Randomized Phase II Trial. *Journal of clinical oncology : official journal of the American Society of Clinical Oncology* 2015;**33**(13):1430-7.
82. Nishio M, Hida T, Atagi S, et al. Multicentre phase II study of nivolumab in Japanese patients with advanced or recurrent non-squamous non-small cell lung cancer. *ESMO open* 2016;**1**(4):e000108.
83. Okada M, Kijima T. Clinical efficacy and safety of nivolumab: results of a multicenter, open-label, single-arm, Japanese phase 2 study in malignant pleural mesothelioma (MERIT). 2019.
84. Omuro A, Vlahovic G, Lim M, et al. Nivolumab with or without ipilimumab in patients with recurrent glioblastoma: results from exploratory phase I cohorts of CheckMate 143. *Neuro-oncology* 2018;**20**(5):674-86.
85. Ornstein MC, Wood LS, Hobbs BP, et al. A phase II trial of intermittent nivolumab in patients with metastatic renal cell carcinoma (mRCC) who have received prior anti-angiogenic therapy. *J Immunother Cancer* 2019;**7**(1):127.
86. Overman MJ, McDermott R, Leach JL, et al. Nivolumab in patients with metastatic DNA mismatch repair-deficient or microsatellite instability-high colorectal cancer (CheckMate 142): an open-label, multicentre, phase 2 study. *The Lancet Oncology* 2017;**18**(9):1182-91.
87. Quispel-Janssen J, van der Noort V, de Vries JF, et al. Programmed Death 1 Blockade With Nivolumab in Patients With Recurrent Malignant Pleural Mesothelioma. *Journal of thoracic oncology : official publication of the International Association for the Study of Lung Cancer* 2018;**13**(10):1569-76.
88. Ramchandren R, Domingo-Domenech E, Rueda A, et al. Nivolumab for Newly Diagnosed

Advanced-Stage Classic Hodgkin Lymphoma: Safety and Efficacy in the Phase II CheckMate 205 Study. *Journal of clinical oncology : official journal of the American Society of Clinical Oncology* 2019;**Jco1900315**.

89. Rizvi NA, Mazieres J, Planchard D, et al. Activity and safety of nivolumab, an anti-PD-1 immune checkpoint inhibitor, for patients with advanced, refractory squamous non-small-cell lung cancer (CheckMate 063): a phase 2, single-arm trial. *The Lancet Oncology* 2015;**16(3):257-65**.
90. Scherpereel A, Mazieres J, Greillier L, et al. Nivolumab or nivolumab plus ipilimumab in patients with relapsed malignant pleural mesothelioma (IFCT-1501 MAPS2): a multicentre, open-label, randomised, non-comparative, phase 2 trial. *The Lancet Oncology* 2019;**20(2):239-53**.
91. Sharma P, Siefker-Radtke A, de Braud F, et al. Nivolumab Alone and With Ipilimumab in Previously Treated Metastatic Urothelial Carcinoma: CheckMate 032 Nivolumab 1 mg/kg Plus Ipilimumab 3 mg/kg Expansion Cohort Results. *Journal of clinical oncology : official journal of the American Society of Clinical Oncology* 2019;**37(19):1608-16**.
92. Sharma P, Retz M, Siefker-Radtke A, et al. Nivolumab in metastatic urothelial carcinoma after platinum therapy (CheckMate 275): a multicentre, single-arm, phase 2 trial. *The Lancet Oncology* 2017;**18(3):312-22**.
93. Teraoka S, Fujimoto D, Morimoto T, et al. Early Immune-Related Adverse Events and Association with Outcome in Advanced Non-Small Cell Lung Cancer Patients Treated with Nivolumab: A Prospective Cohort Study. *Journal of thoracic oncology : official publication of the International Association for the Study of Lung Cancer* 2017;**12(12):1798-805**.

94. Topalian SL, Hodi FS, Brahmer JR, et al. Safety, activity, and immune correlates of anti-PD-1 antibody in cancer. *The New England journal of medicine* 2012;**366**(26):2443-54.
95. Topalian SL, Sznol M, McDermott DF, et al. Survival, durable tumor remission, and long-term safety in patients with advanced melanoma receiving nivolumab. *Journal of clinical oncology : official journal of the American Society of Clinical Oncology* 2014;**32**(10):1020-30.
96. Ueno M, Ikeda M, Morizane C, et al. Nivolumab alone or in combination with cisplatin plus gemcitabine in Japanese patients with unresectable or recurrent biliary tract cancer: a non-randomised, multicentre, open-label, phase 1 study. *The lancet Gastroenterology & hepatology* 2019;**4**(8):611-21.
97. Voorwerk L, Slagter M, Horlings HM. Immune induction strategies in metastatic triple-negative breast cancer to enhance the sensitivity to PD-1 blockade: the TONIC trial. 2019;**25**(6):920-28.
98. Weber JS, Kudchadkar RR, Yu B, et al. Safety, efficacy, and biomarkers of nivolumab with vaccine in ipilimumab-refractory or -naive melanoma. *Journal of clinical oncology : official journal of the American Society of Clinical Oncology* 2013;**31**(34):4311-8.
99. Weber J, Gibney G, Kudchadkar R, et al. Phase I/II Study of Metastatic Melanoma Patients Treated with Nivolumab Who Had Progressed after Ipilimumab. *Cancer immunology research* 2016;**4**(4):345-53.
100. Wu YL, Lu S, Cheng Y, et al. Nivolumab Versus Docetaxel in a Predominantly Chinese Patient Population With Previously Treated Advanced NSCLC: CheckMate 078 Randomized Phase III Clinical Trial. *Journal of thoracic oncology : official publication of the*

International Association for the Study of Lung Cancer 2019;**14**(5):867-75.

101. Yamamoto N, Nokihara H, Yamada Y, et al. Phase I study of Nivolumab, an anti-PD-1 antibody, in patients with malignant solid tumors. *Investigational new drugs* 2017;**35**(2):207-16.
102. Yamazaki N, Kiyohara Y, Uhara H, et al. Efficacy and safety of nivolumab in Japanese patients with previously untreated advanced melanoma: A phase II study. *Cancer science* 2017;**108**(6):1223-30.
103. Adams S, Loi S, Toppmeyer D, et al. Pembrolizumab monotherapy for previously untreated, PD-L1-positive, metastatic triple-negative breast cancer: cohort B of the phase II KEYNOTE-086 study. *Annals of oncology : official journal of the European Society for Medical Oncology / ESMO* 2019;**30**(3):405-11.
104. Adams S, Schmid P, Rugo HS, et al. Pembrolizumab monotherapy for previously treated metastatic triple-negative breast cancer: cohort A of the phase II KEYNOTE-086 study. *Annals of oncology : official journal of the European Society for Medical Oncology / ESMO* 2019;**30**(3):397-404.
105. Adra N, Einhorn LH, Althouse SK, et al. Phase II trial of pembrolizumab in patients with platinum refractory germ-cell tumors: a Hoosier Cancer Research Network Study GU14-206. *Annals of oncology : official journal of the European Society for Medical Oncology / ESMO* 2018;**29**(1):209-14.
106. Alley EW, Lopez J, Santoro A, et al. Clinical safety and activity of pembrolizumab in patients with malignant pleural mesothelioma (KEYNOTE-028): preliminary results from a non-randomised, open-label, phase 1b trial. *The Lancet Oncology* 2017;**18**(5):623-30.
107. Armand P, Shipp MA, Ribrag V, et al. Programmed Death-1 Blockade With Pembrolizumab in

- Patients With Classical Hodgkin Lymphoma After Brentuximab Vedotin Failure. *Journal of clinical oncology : official journal of the American Society of Clinical Oncology* 2016;**34**(31):3733-39.
108. Armand P, Chen YB, Redd RA, et al. PD-1 blockade with pembrolizumab for classical Hodgkin lymphoma after autologous stem cell transplantation. 2019;**134**(1):22-29.
109. Balar AV, Castellano D, O'Donnell PH, et al. First-line pembrolizumab in cisplatin-ineligible patients with locally advanced and unresectable or metastatic urothelial cancer (KEYNOTE-052): a multicentre, single-arm, phase 2 study. *The Lancet Oncology* 2017;**18**(11):1483-92.
110. Barta SK, Zain J, MacFarlane AWt, et al. Phase II Study of the PD-1 Inhibitor Pembrolizumab for the Treatment of Relapsed or Refractory Mature T-cell Lymphoma. *Clinical lymphoma, myeloma & leukemia* 2019;**19**(6):356-64.e3.
111. Bauml J, Seiwert TY, Pfister DG, et al. Pembrolizumab for Platinum- and Cetuximab-Refractory Head and Neck Cancer: Results From a Single-Arm, Phase II Study. *Journal of clinical oncology : official journal of the American Society of Clinical Oncology* 2017;**35**(14):1542-49.
112. Carlino MS, Long GV, Schadendorf D, et al. Outcomes by line of therapy and programmed death ligand 1 expression in patients with advanced melanoma treated with pembrolizumab or ipilimumab in KEYNOTE-006: A randomised clinical trial. *European journal of cancer* 2018;**101**:236-43.
113. Chen R, Zinzani PL, Fanale MA, et al. Phase II Study of the Efficacy and Safety of Pembrolizumab for Relapsed/Refractory Classic Hodgkin Lymphoma. *Journal of clinical*

- oncology : official journal of the American Society of Clinical Oncology  
2017;**35**(19):2125-32.
114. Cho J, Kim HS, Ku BM, et al. Pembrolizumab for Patients With Refractory or Relapsed Thymic Epithelial Tumor: An Open-Label Phase II Trial. Journal of clinical oncology : official journal of the American Society of Clinical Oncology 2018;Jco2017773184.
115. Chung HC, Ros W, Delord JP, et al. Efficacy and Safety of Pembrolizumab in Previously Treated Advanced Cervical Cancer: Results From the Phase II KEYNOTE-158 Study. Journal of clinical oncology : official journal of the American Society of Clinical Oncology 2019;**37**(17):1470-78.
116. Cohen RB, Delord JP, Doi T, et al. Pembrolizumab for the Treatment of Advanced Salivary Gland Carcinoma: Findings of the Phase 1b KEYNOTE-028 Study. Am J Clin Oncol 2018.
117. Cohen EEW, Soulieres D, Le Tourneau C, et al. Pembrolizumab versus methotrexate, docetaxel, or cetuximab for recurrent or metastatic head-and-neck squamous cell carcinoma (KEYNOTE-040): a randomised, open-label, phase 3 study. Lancet 2019;**393**(10167):156-67.
118. Doi T, Piha-Paul SA, Jalal SI, et al. Safety and Antitumor Activity of the Anti-Programmed Death-1 Antibody Pembrolizumab in Patients With Advanced Esophageal Carcinoma. Journal of clinical oncology : official journal of the American Society of Clinical Oncology 2018;**36**(1):61-67.
119. Feun LG, Li YY, Wu C, et al. Phase 2 study of pembrolizumab and circulating biomarkers to predict anticancer response in advanced, unresectable hepatocellular carcinoma. Cancer 2019.

120. Fradet Y, Bellmunt J, Vaughn DJ, et al. Randomized phase III KEYNOTE-045 trial of pembrolizumab versus paclitaxel, docetaxel, or vinflunine in recurrent advanced urothelial cancer: results of > 2 years of follow-up. *Annals of oncology : official journal of the European Society for Medical Oncology / ESMO* 2019.
121. Frenel JS, Le Tourneau C, O'Neil B, et al. Safety and Efficacy of Pembrolizumab in Advanced, Programmed Death Ligand 1-Positive Cervical Cancer: Results From the Phase Ib KEYNOTE-028 Trial. *Journal of clinical oncology : official journal of the American Society of Clinical Oncology* 2017;**35**(36):4035-41.
122. Fuchs CS, Doi T, Jang RW, et al. Safety and Efficacy of Pembrolizumab Monotherapy in Patients With Previously Treated Advanced Gastric and Gastroesophageal Junction Cancer: Phase 2 Clinical KEYNOTE-059 Trial. *JAMA oncology* 2018;**4**(5):e180013.
123. Gadgeel SM, Pennell NA, Fidler MJ, et al. Phase II Study of Maintenance Pembrolizumab in Patients with Extensive-Stage Small Cell Lung Cancer (SCLC). *Journal of thoracic oncology : official publication of the International Association for the Study of Lung Cancer* 2018;**13**(9):1393-99.
124. Giaccone G, Kim C, Thompson J, et al. Pembrolizumab in patients with thymic carcinoma: a single-arm, single-centre, phase 2 study. *The Lancet Oncology* 2018;**19**(3):347-55.
125. Goldberg SB, Gettinger SN, Mahajan A, et al. Pembrolizumab for patients with melanoma or non-small-cell lung cancer and untreated brain metastases: early analysis of a non-randomised, open-label, phase 2 trial. *The Lancet Oncology* 2016;**17**(7):976-83.
126. Hamid O, Puzanov I, Dummer R, et al. Final analysis of a randomised trial comparing pembrolizumab versus investigator-choice chemotherapy for ipilimumab-refractory



- advanced melanoma. *European journal of cancer* 2017;**86**:37-45.
127. Hamid O, Robert C, Daud A, et al. Five-year survival outcomes for patients with advanced melanoma treated with pembrolizumab in KEYNOTE-001. *Annals of oncology : official journal of the European Society for Medical Oncology / ESMO* 2019;**30**(4):582-88.
128. Hansen AR, Massard C, Ott PA, et al. Pembrolizumab for advanced prostate adenocarcinoma: findings of the KEYNOTE-028 study. *Annals of oncology : official journal of the European Society for Medical Oncology / ESMO* 2018;**29**(8):1807-13.
129. Herbst RS, Baas P, Perez-Gracia JL, et al. Use of archival versus newly collected tumor samples for assessing PD-L1 expression and overall survival: an updated analysis of KEYNOTE-010 trial. *Annals of oncology : official journal of the European Society for Medical Oncology / ESMO* 2019;**30**(2):281-89.
130. Hsu C, Lee SH, Ejadi S, et al. Safety and Antitumor Activity of Pembrolizumab in Patients With Programmed Death-Ligand 1-Positive Nasopharyngeal Carcinoma: Results of the KEYNOTE-028 Study. *Journal of clinical oncology : official journal of the American Society of Clinical Oncology* 2017;**35**(36):4050-56.
131. Huang AC, Orlowski RJ, Xu X, et al. A single dose of neoadjuvant PD-1 blockade predicts clinical outcomes in resectable melanoma. 2019;**25**(3):454-61.
132. Kluger HM, Chiang V, Mahajan A, et al. Long-Term Survival of Patients With Melanoma With Active Brain Metastases Treated With Pembrolizumab on a Phase II Trial. *Journal of clinical oncology : official journal of the American Society of Clinical Oncology* 2019;**37**(1):52-60.
133. Leighl NB, Hellmann MD, Hui R, et al. Pembrolizumab in patients with advanced non-small-

- cell lung cancer (KEYNOTE-001): 3-year results from an open-label, phase 1 study. *The Lancet Respiratory medicine* 2019;**7**(4):347-57.
134. Levy BP, Giaccone G, Besse B, et al. Randomised phase 2 study of pembrolizumab plus CC-486 versus pembrolizumab plus placebo in patients with previously treated advanced non-small cell lung cancer. *European journal of cancer* 2019;**108**:120-28.
135. Long GV, Dummer R, Hamid O, et al. Epcadostat plus pembrolizumab versus placebo plus pembrolizumab in patients with unresectable or metastatic melanoma (ECHO-301/KEYNOTE-252): a phase 3, randomised, double-blind study. *The Lancet Oncology* 2019.
136. Matulonis UA, Shapira-Frommer R, Santin AD, et al. Antitumor Activity and Safety of Pembrolizumab in Patients with Advanced Recurrent Ovarian Cancer: Results from the Phase 2 KEYNOTE-100 Study. *Annals of oncology : official journal of the European Society for Medical Oncology / ESMO* 2019.
137. Mehra R, Seiwert TY, Gupta S, et al. Efficacy and safety of pembrolizumab in recurrent/metastatic head and neck squamous cell carcinoma: pooled analyses after long-term follow-up in KEYNOTE-012. *British journal of cancer* 2018;**119**(2):153-59.
138. Mok TSK, Wu YL, Kudaba I, et al. Pembrolizumab versus chemotherapy for previously untreated, PD-L1-expressing, locally advanced or metastatic non-small-cell lung cancer (KEYNOTE-042): a randomised, open-label, controlled, phase 3 trial. *Lancet* 2019;**393**(10183):1819-30.
139. Muro K, Chung HC, Shankaran V, et al. Pembrolizumab for patients with PD-L1-positive advanced gastric cancer (KEYNOTE-012): a multicentre, open-label, phase 1b trial. *The*

Lancet Oncology 2016;**17**(6):717-26.

140. Nanda R, Chow LQ, Dees EC, et al. Pembrolizumab in Patients With Advanced Triple-Negative Breast Cancer: Phase Ib KEYNOTE-012 Study. Journal of clinical oncology : official journal of the American Society of Clinical Oncology 2016;**34**(21):2460-7.
141. Nghiem P, Bhatia S, Lipson EJ, et al. Durable Tumor Regression and Overall Survival in Patients With Advanced Merkel Cell Carcinoma Receiving Pembrolizumab as First-Line Therapy. Journal of clinical oncology : official journal of the American Society of Clinical Oncology 2019;**37**(9):693-702.
142. Nishio M, Takahashi T, Yoshioka H, et al. KEYNOTE-025: Phase 1b study of pembrolizumab in Japanese patients with previously treated programmed death ligand 1-positive advanced non-small-cell lung cancer. 2019;**110**(3):1012-20.
143. Ott PA, Piha-Paul SA, Munster P, et al. Safety and antitumor activity of the anti-PD-1 antibody pembrolizumab in patients with recurrent carcinoma of the anal canal. Annals of oncology : official journal of the European Society for Medical Oncology / ESMO 2017;**28**(5):1036-41.
144. Ott PA, Elez E, Hiret S, et al. Pembrolizumab in Patients With Extensive-Stage Small-Cell Lung Cancer: Results From the Phase Ib KEYNOTE-028 Study. Journal of clinical oncology : official journal of the American Society of Clinical Oncology 2017;**35**(34):3823-29.
145. Ott PA, Bang YJ, Berton-Rigaud D, et al. Safety and Antitumor Activity of Pembrolizumab in Advanced Programmed Death Ligand 1-Positive Endometrial Cancer: Results From the KEYNOTE-028 Study. Journal of clinical oncology : official journal of the American

Society of Clinical Oncology 2017;**35**(22):2535-41.

146. Ott PA, Bang YJ, Piha-Paul SA, et al. T-Cell-Inflamed Gene-Expression Profile, Programmed Death Ligand 1 Expression, and Tumor Mutational Burden Predict Efficacy in Patients Treated With Pembrolizumab Across 20 Cancers: KEYNOTE-028. *Journal of clinical oncology : official journal of the American Society of Clinical Oncology* 2019;**37**(4):318-27.
147. Plimack ER, Bellmunt J, Gupta S, et al. Safety and activity of pembrolizumab in patients with locally advanced or metastatic urothelial cancer (KEYNOTE-012): a non-randomised, open-label, phase 1b study. *The Lancet Oncology* 2017;**18**(2):212-20.
148. Reck M, Rodriguez-Abreu D, Robinson AG, et al. Updated Analysis of KEYNOTE-024: Pembrolizumab Versus Platinum-Based Chemotherapy for Advanced Non-Small-Cell Lung Cancer With PD-L1 Tumor Proportion Score of 50% or Greater. *Journal of clinical oncology : official journal of the American Society of Clinical Oncology* 2019;**37**(7):537-46.
149. Ribrag V, Avigan DE, Green DJ, et al. Phase 1b trial of pembrolizumab monotherapy for relapsed/refractory multiple myeloma: KEYNOTE-013. *Br J Haematol* 2019.
150. Rugo HS, Delord JP, Im SA. Safety and Antitumor Activity of Pembrolizumab in Patients with Estrogen Receptor-Positive/Human Epidermal Growth Factor Receptor 2-Negative Advanced Breast Cancer. 2018;**24**(12):2804-11.
151. Seiwert TY, Burtneß B, Mehra R, et al. Safety and clinical activity of pembrolizumab for treatment of recurrent or metastatic squamous cell carcinoma of the head and neck (KEYNOTE-012): an open-label, multicentre, phase 1b trial. *The Lancet Oncology*

2016;**17**(7):956-65.

152. Shah MA, Kojima T, Hochhauser D, et al. Efficacy and Safety of Pembrolizumab for Heavily Pretreated Patients With Advanced, Metastatic Adenocarcinoma or Squamous Cell Carcinoma of the Esophagus: The Phase 2 KEYNOTE-180 Study. *JAMA oncology* 2018.
153. Shimizu T, Seto T, Hirai F, et al. Phase 1 study of pembrolizumab (MK-3475; anti-PD-1 monoclonal antibody) in Japanese patients with advanced solid tumors. *Investigational new drugs* 2016;**34**(3):347-54.
154. Shitara K, Ozguroglu M, Bang YJ, et al. Pembrolizumab versus paclitaxel for previously treated, advanced gastric or gastro-oesophageal junction cancer (KEYNOTE-061): a randomised, open-label, controlled, phase 3 trial. *Lancet* 2018;**392**(10142):123-33.
155. Si L, Zhang X, Shu Y, et al. A Phase Ib Study of Pembrolizumab as Second-Line Therapy for Chinese Patients With Advanced or Metastatic Melanoma (KEYNOTE-151). *Translational oncology* 2019;**12**(6):828-35.
156. Tawbi HA, Burgess M, Bolejack V, et al. Pembrolizumab in advanced soft-tissue sarcoma and bone sarcoma (SARC028): a multicentre, two-cohort, single-arm, open-label, phase 2 trial. *The Lancet Oncology* 2017;**18**(11):1493-501.
157. Varga A, Piha-Paul S, Ott PA, et al. Pembrolizumab in patients with programmed death ligand 1-positive advanced ovarian cancer: Analysis of KEYNOTE-028. *Gynecol Oncol* 2019;**152**(2):243-50.
158. Yamazaki N, Takenouchi T, Fujimoto M, et al. Phase 1b study of pembrolizumab (MK-3475; anti-PD-1 monoclonal antibody) in Japanese patients with advanced melanoma (KEYNOTE-041). *Cancer chemotherapy and pharmacology* 2017;**79**(4):651-60.

159. Zhu AX, Finn RS, Edeline J, et al. Pembrolizumab in patients with advanced hepatocellular carcinoma previously treated with sorafenib (KEYNOTE-224): a non-randomised, open-label phase 2 trial. *The Lancet Oncology* 2018;**19**(7):940-52.
160. Zinzani PL, Ribrag V, Moskowitz CH, et al. Safety and tolerability of pembrolizumab in patients with relapsed/refractory primary mediastinal large B-cell lymphoma. *Blood* 2017;**130**(3):267-70.
